# 1 **Allometric scaling of a superposition eye optimises** 2 **sensitivity and acuity in large and small hawkmoths.**

3 Anna Stöckl<sup>1</sup>, Rebecca Grittner<sup>1</sup>, Gavin Taylor<sup>2</sup>, Christoph Rau<sup>3</sup>, Andrew J Bodey<sup>3</sup>, Almut  
4 Kelber<sup>4</sup>, Emily Baird<sup>5</sup>

5  
6 <sup>1</sup>*Behavioral Physiology and Sociobiology (Zoology II), University of Würzburg, Würzburg, Germany*

7 <sup>2</sup>*Institute for Globally Distributed Open Research and Education (IGDORE), Ribeirão Preto, Brazil*

8 <sup>3</sup>*Diamond Light Source, Oxfordshire, United Kingdom*

9 <sup>4</sup>*Department of Biology, Lund University, Lund, Sweden*

10 <sup>5</sup>*Department of Zoology, Stockholm University, Stockholm, Sweden*

11

12

## 13 **Abstract**

14 Animals vary widely in body size across and within species. This has consequences in large  
15 and small individuals for the function of organs and body parts. How these scale in relation to  
16 body size reveals evolutionary investment strategies, often resulting in trade-offs between  
17 functions. Eyes exemplify these trade-offs, as they are limited by their absolute size in two key  
18 performance features: sensitivity and spatial acuity. Previous studies of the 3D structure of  
19 apposition compound eyes, which are ideal models for allometric studies due to their size  
20 polymorphism, revealed that allometric scaling improves both local resolution and visual  
21 sensitivity in larger bumblebees (Taylor et al., 2019). Here, we build on the established  
22 methods and results to investigate allometric scaling in superposition compound eyes – the  
23 second prominent eye type in insects – for the first time. Our research highlights a surprising  
24 strategy to cope with the challenge of trading off sensitivity and spatial resolution in small eyes,  
25 as we show that the eyes of the hummingbird hawkmoth retain an optimal balance of these  
26 performance measures across all body sizes.

27

28

## 29 Introduction

30 Animals of the same species can vary considerably in body size (Blanckenhorn, 2000; Chown  
31 & Gaston, 2010; Sibly & Brown, 2007). Such differences have performance consequences for  
32 body parts or organs in larger and smaller individuals, particularly when their function depends  
33 on absolute rather than relative size (Spence, 2009). A key organ that exemplifies the  
34 evolutionary strategies to cope with the behavioural and ecological consequences of body size  
35 variation is the eye, because eyes are performance-constrained by their absolute size. Eye  
36 size, in turn, is limited by body size, due to the energy and weight constraints associated with  
37 carrying large eye structure, particularly in small flying animals (Niven & Laughlin, 2008). Eye  
38 size limits two central features of eye functionality: sensitivity and spatial resolution (Land et al.,  
39 1997; Snyder, 1977; Snyder et al., 1977; Warrant & McIntyre, 1993). Larger eyes can collect  
40 more photons, due to a potentially larger light collecting aperture and focal length, as well as  
41 the diameter and length of their photoreceptive units. Higher sensitivity is not just important for  
42 seeing well in dim light (Warrant & McIntyre, 1993), but also for discriminating fine contrast  
43 changes at higher light intensities (Snyder, 1977; Snyder et al., 1977). In addition, spatial  
44 resolution is limited by the number of visual units packed into an eye of a given viewing angle  
45 – thus the number of “pixels” that can be resolved across the eyes’ field of view (Land et al.,  
46 1997; Snyder, 1977; Snyder et al., 1977; Warrant & McIntyre, 1993). While a small eye could  
47 densely pack many visual units with high acuity, the small eye size means that they will have  
48 to be narrower than in larger eyes, and thus of lower light sensitivity, and consequently lower  
49 contrast resolution (Snyder, 1977; Snyder et al., 1977). This size limit on spatial resolution is  
50 exacerbated in eyes with small lenses, such as the compound eyes of insects. Here, the small  
51 diameter of facets can set a diffraction-limit to the optical resolution, resulting in blurred visual  
52 projections (Snyder, 1979; Stavenga, 2003; Stavenga, 2006; Warrant et al., 2007). Combined  
53 with their generally small body size that restricts the absolute eye size (Niven & Laughlin,  
54 2008), these challenges to sensitivity and spatial resolution make insect compound eyes an  
55 ideal model to study how eyes scale allometrically for optimal performance in small animals.

56 One strategy that most insect species use to cope with these challenges is to preserve an eye  
57 as large as possible in small individuals, resulting in a negative allometric relationship between  
58 eye and body size. This means that smaller individuals have absolutely smaller but relatively  
59 larger eyes for their body size), within and across species (bees: (Jander & Jander, 2002;  
60 Spaethe, 2003; Streinzer & Spaethe, 2014; Taylor et al., 2019), ants: (Perl & Niven, 2016a;  
61 Zollikofer et al., 1995), butterflies: (Merry et al., 2006; Rutowski, 2000), and flies (Currea et al.,  
62 2018). Positive allometry between eye and body size is rare (Streinzer et al., 2016). A second  
63 trend commonly observed in insects is a negative allometry between facet size and eye size  
64 (Currea et al., 2018; Merry et al., 2006; Perl & Niven, 2016a; Taylor et al., 2019; Zollikofer  
65 et al., 1995). A relatively larger facet size in smaller individuals can improve visual sensitivity  
66 (Land et al., 1997). Larger bumblebees, for example, forage at lower light intensities than  
67 smaller ones (Kapustjanskij et al., 2007) and detect smaller point-targets because of an  
68 increased sensitivity of individual ommatidia (Spaethe, 2003). These scaling strategies do not  
69 always manifest over the entire eye, but can also differ locally (Perl & Niven, 2016b). In  
70 bumblebees, for example, larger individuals benefit from optimising spatial acuity in their frontal  
71 acute zone, while the overall spatial resolution of the eye remains similar in all individuals  
72 (Taylor et al., 2019).

73 All of these insights into the scaling strategies of insect eyes are based on apposition  
74 compound eyes, in which the sensitivity of individual optical units is limited by their facet size.  
75 A large proportion of insects, however, especially among the Lepidoptera and Coleoptera  
76 (Exner, 1891; Kunze, 1972), possesses a different eye type: superposition compound eyes.

77 This eye type is typically found in nocturnal insects, though with prominent diurnal exceptions.  
78 It provides a highly increased sensitivity compared to apposition eyes (Land et al., 1997;  
79 Snyder, 1977; Warrant & McIntyre, 1993), since hundreds of neighbouring facets can focus  
80 light onto a single rhabdom, acting as a functional lens with an aperture larger than that of a  
81 single facet (Exner, 1891). This increased single-ommatidial photon capture might lead to  
82 different selection constraints in the scaling with body size compared to apposition eyes  
83 (Meyer-Rochow & Gál, 2004). Moreover, because of the intricate optical arrangements of  
84 multiple corneal lenses and crystalline cones that focus light onto a single rhabdom,  
85 superposition compound eyes might be less flexible for local modifications, as these could  
86 compromise the superposition optics. Thus, revealing the scaling strategies of superposition  
87 compound eyes will be an important contribution to understanding the visual constraints of  
88 many beetle and moths species – many of which are important diurnal and nocturnal pollinators  
89 (Kevan & Baker, 1983; Proctor M, 1996).

90 To quantify how superposition compound eyes scale with body size, we chose to study an  
91 insect model that can directly compared to species with apposition eyes: the hummingbird  
92 hawkmoth *Macroglossum stellatarum*. As day-active nectar foragers (Stöckl & Kelber, 2019),  
93 these moths are under similar visual constraints as many previously tested hymenopteran and  
94 lepidopteran species, and share habitats and host plants with common Eurasian bee and  
95 butterfly species. To quantify the allometric scaling of optical and sensory structures of the  
96 eyes of large and small hummingbird hawkmoths, we used X-ray micro computed tomography  
97 (Bagheri et al., 2019; Baird & Taylor, 2017; Taylor et al., 2019). Even though the eyes of  
98 hawkmoths are generally designed for high photon catch, we found a strong negative allometry  
99 between eye and body size, and between facet diameter and eye size, resulting in a  
100 proportional increase of sensitivity in small hawkmoth eyes. Our modelling provides an  
101 explanation for this counterintuitive finding: the relatively increased facet diameters decreased  
102 the amount of diffraction blur, thus benefiting spatial acuity in small eyes. Moreover, the  
103 observed scaling exponents optimised the eyes of large and small individuals to the smallest  
104 possible variation in sensitivity and spatial acuity, thus retaining a stable optical system across  
105 scales. Our results thus demonstrate that both visual functions are mutually optimised by  
106 scaling strategies in small superposition compound eyes.

107

## 108 Results

109 To study how the eye size and eye morphology differed with body size in the superposition  
 110 compound eye of *Macroglossum stellatarum* (Fig. 1A), we selected a total of 25 individuals  
 111 with a wide range of body sizes (Fig. 1D). We obtained surface measures of their eyes (eye  
 112 diameter: Fig. 1B,C, facet size: Fig. 2D) from light microscopy (9 animals) and X-ray  
 113 microtomography (16 animals), which we combined in the subsequent analysis (see Methods).  
 114 We relied on the X-ray tomography data for parameters requiring optical sections.

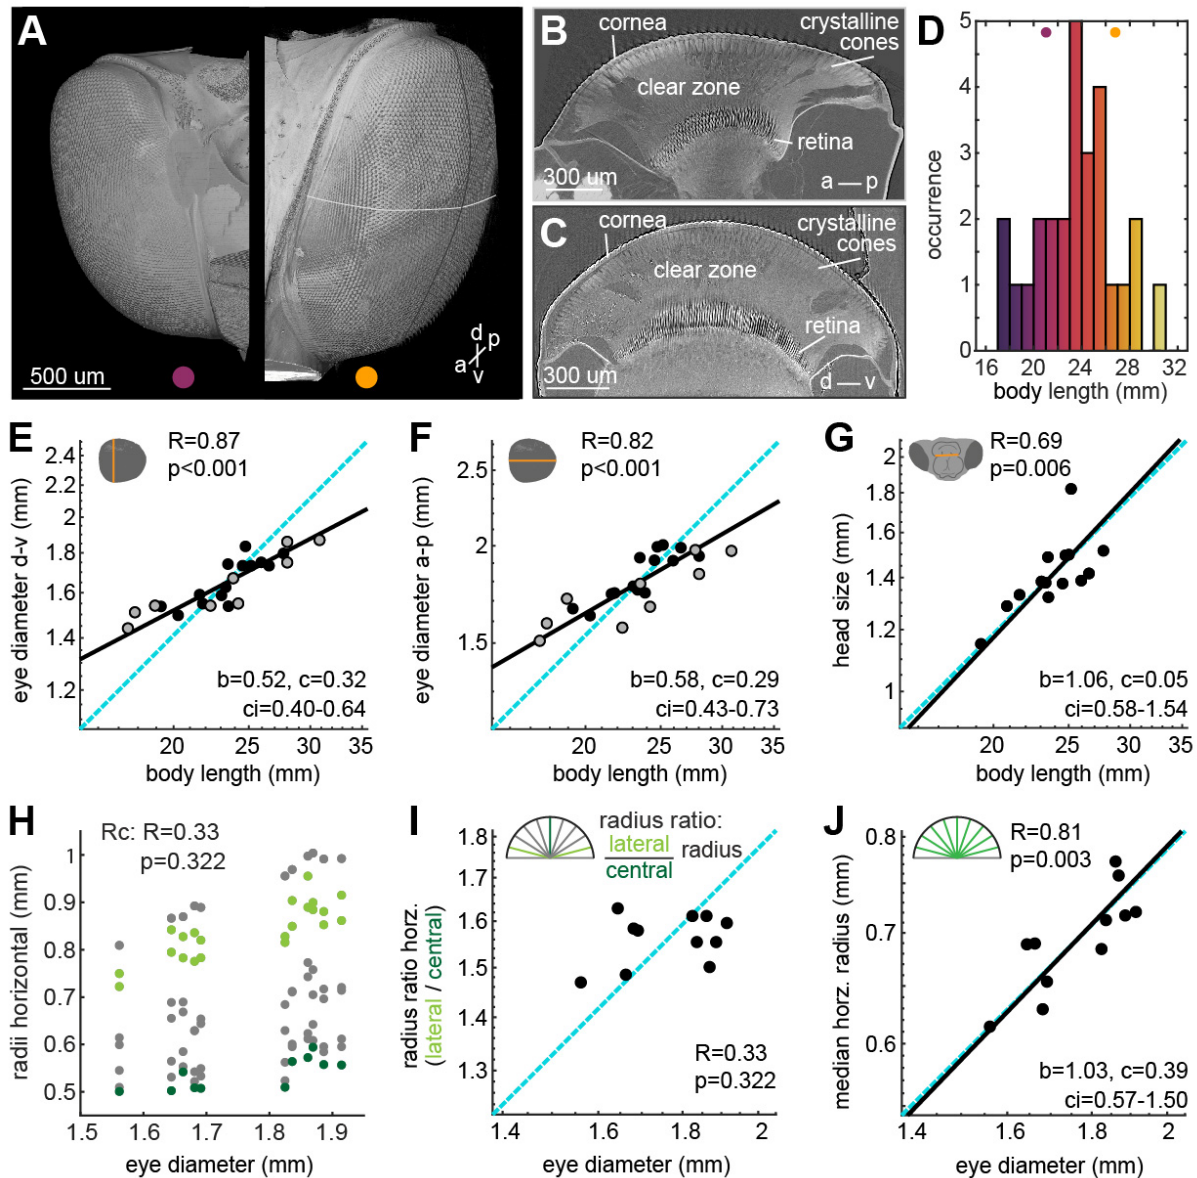

115 **Fig. 1 Allometric scaling of eye and head size in *Macroglossum stellatarum*.**

116 **A** X-ray microtomography images of two individuals of *M. stellatarum*. The animal to the left had a  
 117 body length of 21.8 mm, the right one of 26.5 mm. The scale bar applies to both eyes. **B**  
 118 Representative horizontal and **C** vertical section through the centre of the eye (see white and black  
 119 lines in **A**) with the cornea, crystalline cones, clear zone and retina indicated. **D** Body length of the  
 120 individuals selected for this study. Allometric scaling of the **E** dorsal-ventral, **F** the anterior-posterior  
 121 diameter of the eye, and **G** the head size measured from the left to the right base of the mouth  
 122 parts (Fig. S2A). **H** To test whether the shape of the eye differed across eye diameters, we  
 123 measured the distance from the nodal point formed by the edges of the cornea to the corneal  
 124 surface for nine evenly spaced radii in horizontal sections (see Fig. S3D-F for frontal ones). **I** We  
 125 calculated the ratio between the average lateral radii (light green) and the central radius (dark

126 green) as a proxy for the cornea's shape, and assessed its allometric scaling. **J** The allometric  
127 scaling of the median of the central seven radius measurements (green) with eye diameter. **E-G**,  
128 **I-J** Data from individual hawkmoths was measured by either X-ray microtomography (black dots),  
129 or light-microscopy (grey dots). The dashed cyan line indicates isometric scaling and the black line  
130 represents the allometric scaling relationship.  $R$  is the Pearson correlation coefficient of the log-  
131 transformed data, and  $p$  denotes its statistical significance. Given the significant linear correlations  
132 in **E-G**, **J**, the allometric relationship was calculated using reduced major axis regression, with the  
133 exponential scaling exponent  $b$ , the normalization constant  $c$ , and the confidence interval  $ci$  of  $b$ .

#### 134 **Eye size scales negatively allometric with body size**

135 We observed significant negative allometry between eye diameter and body length with a  
136 scaling coefficient of 0.522 for the dorso-ventral eye diameter (Fig. 1C), and 0.577 for the  
137 anterior-posterior diameter (Fig. 1D). This indicated that smaller hawkmoths had relatively  
138 larger eyes than bigger moths. Moreover, the two axes of the eye had a highly significant  
139 correlation, which scaled isometrically (Fig. S3C), and allowed us to combine the eye diameter  
140 into a single measure where required, by taking the average of the two measures. Since the  
141 eyes comprise a substantial portion of the hawkmoth head, we also checked whether the  
142 scaling in eye size was mirrored by a scaling in head size. Since our specimen preparation did  
143 not preserve the entire head (see Methods), we measured proxies of head size using  
144 landmarks which could be reliably recognised in all preparations (Fig. S2A): the dorso-frontal  
145 (Fig. 1E) and lateral (Fig. S2B) extent of the mouth-part base, and the dorso-ventral extent of  
146 the head capsule surrounding the optic lobes of the brain (Fig. S2C). All of these scaled  
147 isometrically with body size, indicating that only the eyes of *M. stellatarum*, not the head as a  
148 whole, scale negatively allometrically with body size.

#### 149 **Smaller animals have relatively larger, but fewer facets**

150 Given the overall negative allometric relationship between eye and body size, we next  
151 investigated how structures of the eye that relate to spatial acuity and visual sensitivity scale  
152 with body and eye size. To quantify the size of the corneal facet lenses (Fig. 2A), we labelled  
153 all facets in two eyes, and 60-70 regularly spaced facets in all other eyes ( $n=19$ ). The facet  
154 lenses varied in diameter across the hawkmoths' eyes, with the largest facets being located in  
155 a median band along the anterior-posterior extent of the eye surface, and along the entire  
156 dorso-ventral extent of the posterior part of the eye. The histogram of all facet lenses of a  
157 completely reconstructed corneal surface clearly showed two peaks (Fig. 2B, Fig. S4A),  
158 representing the main facets of the eye and a ring of distinctly smaller facets located around  
159 the eyes' perimeter, which are covered by scales in intact hawkmoths. The median diameters  
160 of outer facets, which might be structural in nature, did not correlate significantly with eye  
161 diameter (Fig. S4C). In contrast, the median diameters of the functional main facets ( $> 20 \mu\text{m}$ ),  
162 correlated significantly with eye diameter (Fig. 2D) and body size (Fig. S4B).

163 A negative allometric scaling of facet diameter to eye diameter would indicate that smaller  
164 animals have fewer facets relative to their eye diameter than large ones – provided that the  
165 relationship between the surface area of the cornea and eye size did not differ. Since the  
166 surface area depends on the shape of the cornea, we analysed the scaling of the cornea's  
167 curvature with eye diameter (Fig. 1H-J, Fig. S3D-F). We calculated the ratio of the central and  
168 lateral radii of the eye in horizontal (Fig. 1I) and frontal sections (Fig. S3E) at the dorso-ventral  
169 and anterior-posterior median of the eye, respectively. There was no significant correlation of  
170 the curvature ratio with eye diameter (Fig. 1I, Fig. S3E), while the average radius of the cornea  
171 scaled isometrically with eye size (Fig. 1J, Fig. S3F), indicating that the corneas' curvature  
172 remained the same in large and small eyes. This confirmed the validity of our approach to

173 estimate eye surface based on eye diameter. It also allowed us to estimate the total number  
 174 of facets per eye, by dividing the eye surface area by the median facet diameter. The total  
 175 facet number scaled positively allometric (Fig. 2E), with the lower-bound confidence interval  
 176 exceeding isometry. Thus, smaller hummingbird hawkmoths invested in larger facet diameters  
 177 at the cost of the total number of facets.

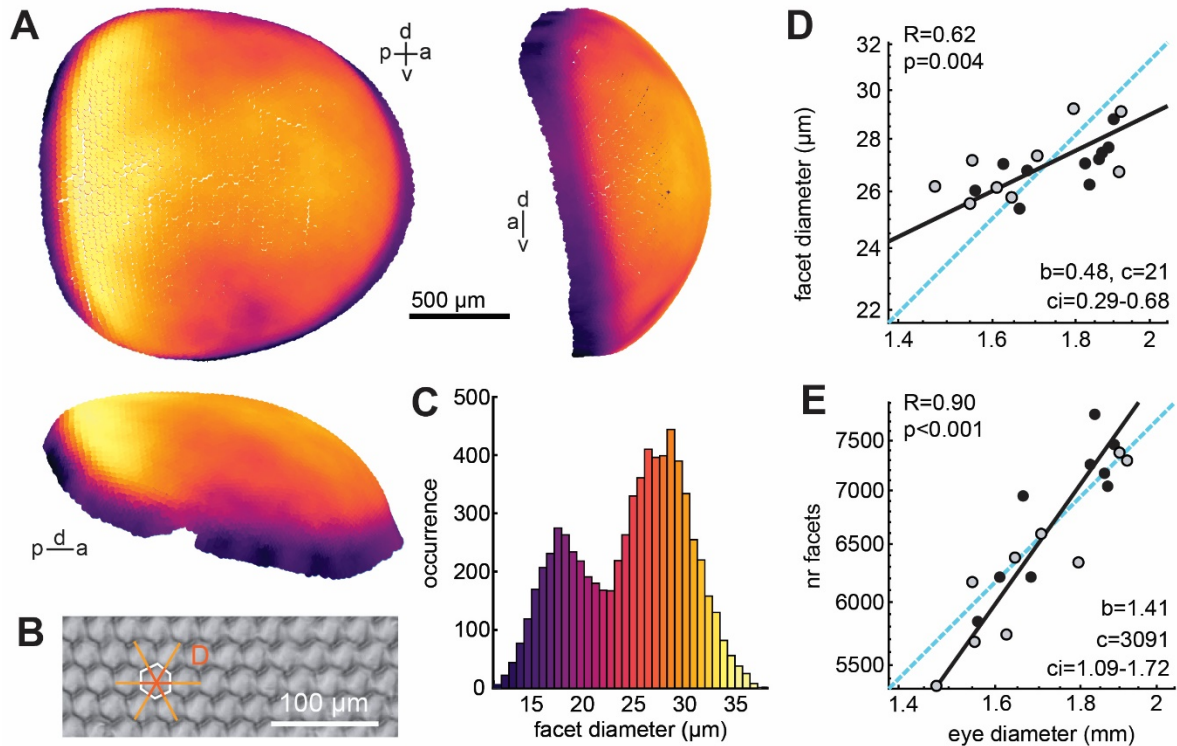

178 Fig. 2 **Cornea morphology and facet allometry of *Macroglossum stellatarum***

179 **A** 3D reconstruction of the facets of an example eye of *M. stellatarum* (total facets: 7111), with facet  
 180 diameter indicated by the colour scale in **C**, top left: sagittal view, top right: anterior view, bottom:  
 181 dorsal view. **B** The facet diameter was calculated as the average of 3 measurements (in light  
 182 orange), to arrive at the facet distribution for the eye shown in **C**. **D** Allometric scaling of the median  
 183 facet diameter of the eyes' main facets ( $> 20 \mu\text{m}$ ), and **E** the total number of facets with eye  
 184 diameter. The total facet number was estimated by dividing the surface of the eye (approximated  
 185 by a circular area based on the eye diameter) by the median facet size. **D-E** Data from individual  
 186 hawkmoths was measured by either X-ray microtomography (black dots), or light-microscopy (grey  
 187 dots). The dashed cyan line indicates isometric scaling and the black line represents the allometric  
 188 scaling relationship.  $R$  is the Pearson correlation coefficient of the log-transformed data, and  $p$   
 189 denotes its statistical significance. Given the significant linear correlations in **D** and **E**, the allometric  
 190 relationship was calculated using reduced major axis regression, with the exponential scaling  
 191 exponent  $b$ , the normalization constant  $c$ , and the confidence interval  $ci$  of  $b$ .

192 To assess whether the shape of the cornea differed with eye diameter, we measured evenly  
 193 spaced eye radii in horizontal and vertical sections (Fig. 1H, S3D). The ratio of the two lateral-  
 194 most radii and the central one in each section was used as an indicator for shape: if, for  
 195 example, a larger eye was rounder than a smaller one, the ratio would be smaller in larger  
 196 eyes, while it would remain the same, if the shape of the cornea did not change. We thus  
 197 analysed the allometric scaling of the radius ratio with eye size, and found there was no  
 198 significant correlation in either the horizontal (Fig. 1I) or frontal sections (Fig. S3E). The median  
 199 of all radii in both horizontal and frontal sections scaled isometrically with eye diameter (Fig.  
 200 1J, S3F)

202 **Rhabdom distance, but not length, scales negatively isometric with eye size**

203 We next analysed whether the scaling relationship of facet lenses transferred to the retina. In  
 204 a typical apposition compound eye, each facet lens forms a structural unit with a group of  
 205 photoreceptors (the rhabdom), termed an ommatidium. In most superposition compound eyes,  
 206 the 1:1 relationship between facet lenses and photoreceptive units exists as well, although the  
 207 optical relationship is uncoupled by the optical units in the superposition pupil focusing light  
 208 from many facet lenses onto a single rhabdom (Exner, 1891; Warrant & McIntyre, 1993). In  
 209 the hummingbird hawkmoth, the anatomical 1:1 relationship between facet lenses and retinal  
 210 units was called into question, due to an optically measured inhomogeneity in facet diameter  
 211 and retinal packing (Warrant 1999). Since the tracheal sheaths surrounding the photoreceptors  
 212 (Warrant et al., 1999) provided high optical contrast, we could fully reconstruct all rhabdom  
 213 positions in two eyes (Fig. 3C, inset). From this, we calculated inter-rhabdom distances (IDR,  
 214 Fig. 3C, inset) similar to the inter-facet distances (Fig. 2A). The inter-facet and inter-rhabdom  
 215 distances showed very different local patterns across the eye, highlighting that the facet  
 216 distribution was uncoupled from the retinal one. However, the total number of rhabdoms and  
 217 facets identified in two eyes were very similar. Indeed, the number of rhabdoms was 6% and  
 218 8% higher – a divergence likely caused by an underestimation of the number of facets, as  
 219 some of the structural facets could not be resolved.

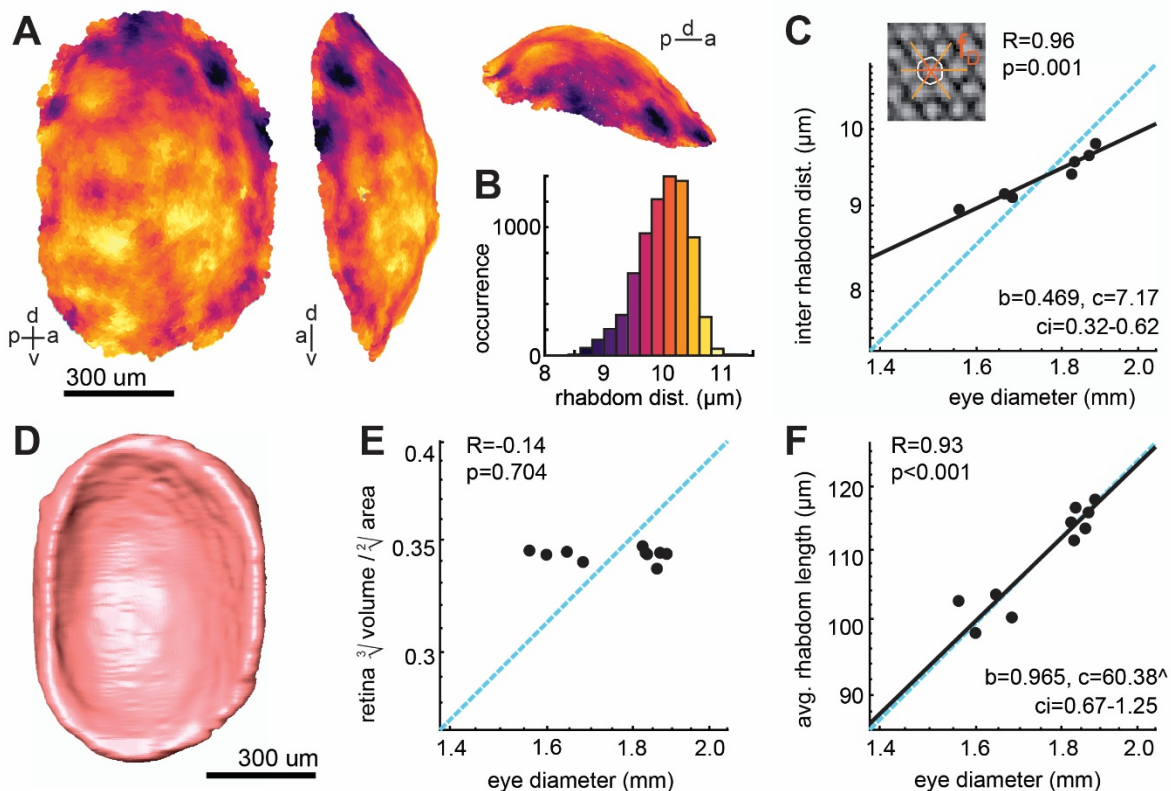

220

221 **Fig. 3 Retinal morphology and rhabdom scaling.**

222 **A** 3D reconstruction of the rhabdoms in an example retina (with 7560 rhabdoms), with inter  
 223 rhabdom distance (IRD) indicated by the colour scale in **B**, top left: sagittal view, top right: anterior  
 224 view, bottom: dorsal view. **C** The inter rhabdom distance (IRD) was measured as the average  
 225 distance between rhabdoms as shown in the inset. Allometric scaling of the IRD. **D** 3D-  
 226 reconstruction of the retinal volume of the example eye. **E** Differences in retinal shape assessed  
 227 as the ratio between retinal volume and surface area across eye diameters. **F** A conserved retinal  
 228 shape across eye sizes allowed us to use the thickness of the retina as a proxy for the average  
 229 rhabdom length, calculated as the volume divided by half the surface area. **C,E,F** Data from  
 230 individual hawkmoths was measured by X-ray microtomography (black dots). The dashed cyan line

231 indicates isometric scaling and the black line represents the allometric scaling relationship.  $R$  is the  
232 Pearson correlation coefficient of the log-transformed data, and  $p$  denotes its statistical  
233 significance. Given the significant linear correlations in **C,F**, the allometric relationship was  
234 calculated using reduced major axis regression, with the exponential scaling exponent  $b$ , the  
235 normalization constant  $c$ , and the confidence interval  $ci$  of  $b$ .

236  
237 For all eyes, we determined the average IRDs in the centre of the retina (see Methods) as a  
238 measure for the separation of the anatomical sampling base of the eyes. This IRD showed  
239 only a single-peaked distribution (Fig. 3B), as compared to the double-peaked distribution of  
240 the facet sizes. Nevertheless, there was still considerable variation in the IRDs (Fig. 3B), which  
241 was systematically larger in the ventral than the dorsal half of the retina (Fig. 3A). The rhabdom  
242 distance scaled negatively allometric with eye size across individuals (Fig. 3C), indicating that  
243 smaller individuals had distinctly larger IRDs than expected for their eye size. Moreover, IRDs  
244 scaled with the same coefficient as facet diameter across eye size (Fig. 2D), and indeed there  
245 was a linear relationship between IRDs and facet diameters (Fig. S6C), giving additional  
246 support to the notion that the number of photoreceptor units in the retina matches the  
247 number of facets in the cornea.

248 To assess how rhabdom length scaled with eye size, we used the thickness of the retina as a  
249 proxy. This is possible if the retinal shape was the same in animals of different body size. We  
250 confirmed this by the comparing the ratio of retinal volume and surface area across eye sizes  
251 (Fig. 3E): if the retina became flatter with eye size, the ratio should decrease, while it should  
252 increase if the retina became thicker. Since the ratio remained the same across eye size (Fig.  
253 3D), we concluded that retinal shape did not scale with eye size. We thus estimated the  
254 rhabdom length by dividing the retinal volume by half its surface area. Unlike IRD, rhabdom  
255 length scaled isometrically with eye size (Fig. 3C). Thus, smaller hummingbird hawkmoths  
256 invested in larger IRDs at the cost of total number of rhabdoms, while the length of their  
257 rhabdoms scaled isometrically with size.

## 258 **Both sensitivity and spatial acuity are optimised in small hawkmoths**

259 To understand how the scaling of the optical and sensory structures affect the function of large  
260 and small hawkmoth eyes, we used the observed allometric relations to calculate key  
261 performance measures of eyes: single-ommatidium sensitivity (Fig. 4A, Methods: equation 5,  
262 according to (Warrant, 1999)), spatial resolution as the photoreceptor acceptance angle (Fig.  
263 4B, Methods: equation 4, according to (Land et al., 1997)), and the limiting feature of spatial  
264 acuity: the half-width of the Airy disc (Fig. 4C, Methods: equation 3). To do so, we used the  
265 measured scaling coefficients of the facet diameter, inter-rhabdom distance (IRD), and  
266 rhabdom length to estimate eye performance for animals of different body lengths. We  
267 approximated the scaling of rhabdom diameters by the scaling of the IRD, assuming that the  
268 tracheal sheath surrounding each rhabdom (which contributed to the IRD, but is not optically  
269 functional), scales isometrically with eye size and remains constant across the eye, which  
270 electron microscopic sections support (Warrant et al., 1999).

271 For these calculations, the focal length of the eye was also required. Although it cannot be  
272 directly determined anatomically in aspherical superposition compound eyes (Warrant, 1999),  
273 we could show that it is valid to apply the same scaling coefficient for the focal length as for  
274 the eye diameter. The focal length in superposition compound eyes can be measured as the  
275 distance from the eyes' nodal point to the tip of the retina (Land et al., 1997; Snyder, 1977).  
276 The nodal point is determined by the eyes' radius, which scaled isometrically with eye size  
277 (Fig. 1J). The distance from the nodal point to the tip of the retina is determined by the eye  
278 radius, and the distance of the retina to the cornea. The latter remained constant across



279 animals of different sizes (Fig. S5), suggesting that the scaling relationship of the focal length  
 280 is determined by the scaling of eye size.

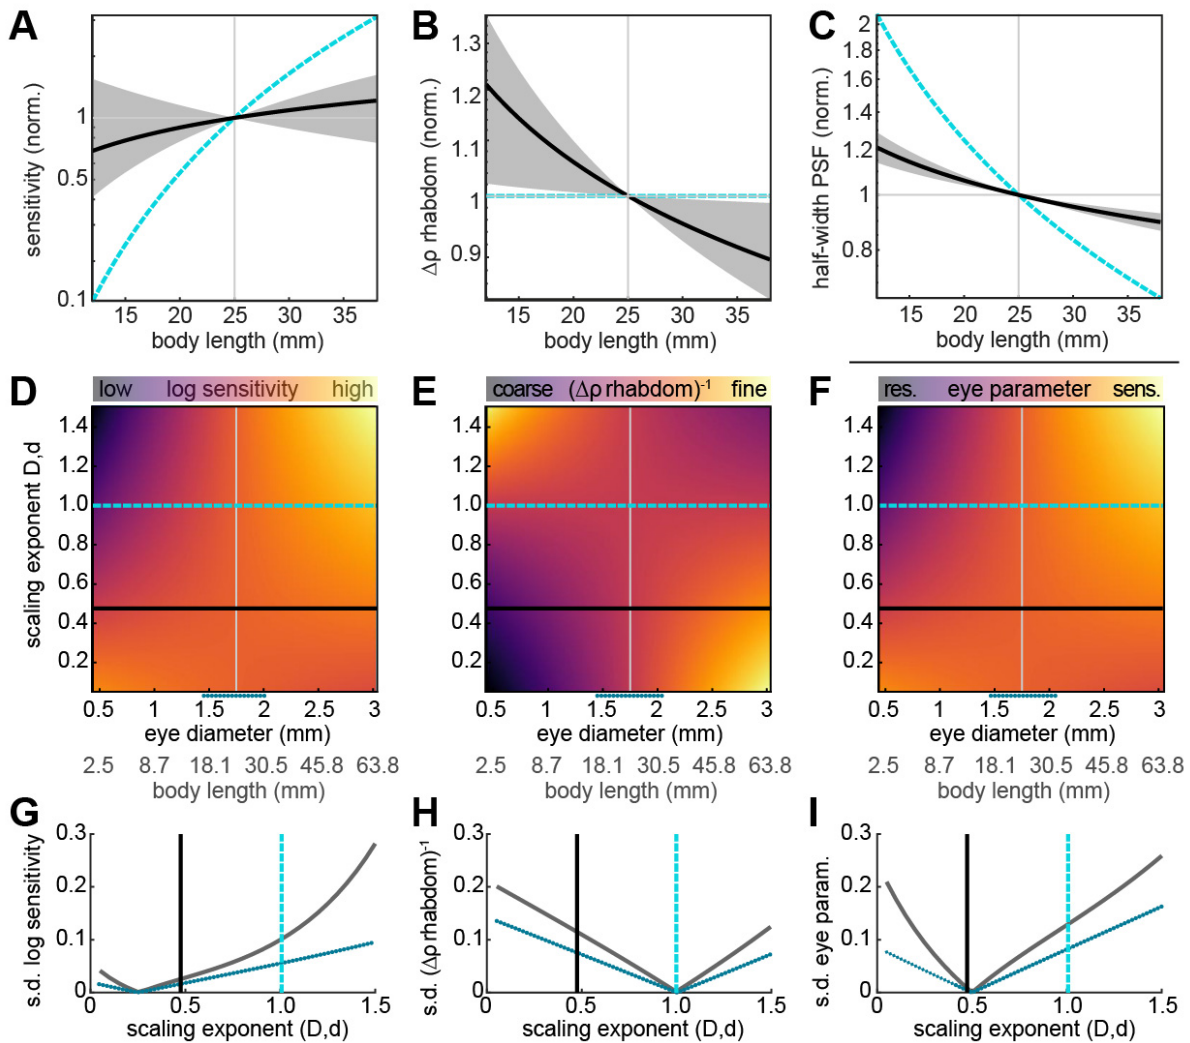

281 **Fig. 4 Model estimation of the allometry of spatial acuity and sensitivity.**

282 We used the measured allometric relations of the inter-facet and inter-rhabdom distance  $D$  and  $d$ ,  
 283 rhabdom length  $l$  and focal length  $f$  (the latter two scaling isometrically) to calculate **A** the sensitivity  
 284 of a single ommatidium according to Warrant & Nilsson, 1998), **B** the rhabdom acceptance angle  
 285 and **C** half-width of the point spread function (PSF), according to Land et al., 1997). All estimates  
 286 of eye performance were calculated for body lengths ranging from 12.5 to 37.5 mm, and normalised  
 287 to a median sized animal of 25 mm body length. All calculations were compared to estimates based  
 288 on an eye in which all parameters scaled isometrically (cyan line). The confidence intervals were  
 289 computed by applying the same calculations to the scaling parameters (exponent and Y-axis  
 290 intercept) with added and subtracted confidence intervals obtained from the regression analysis.  
 291 **D** Log-transformed sensitivity, **E** rhabdom acceptance angle, and **F** eye parameter were calculated  
 292 for a range of scaling exponents applied to the inter-facet and inter-rhabdom distance  $D$  and  $d$  (see  
 293 Methods). **D-F** The resulting values are depicted for different eye diameters (with corresponding  
 294 body lengths indicated in grey), normalised to the largest sensitivity, smallest rhabdom acceptance  
 295 angle, and largest eye parameter. The measured scaling exponent is indicated by the black line,  
 296 and isometry by the blue dashed line. The dotted blue line below the x-axis indicates the measured  
 297 size variation. Variation in **G** log sensitivity, **H** rhabdom acceptance angle, and **I** eye parameter  
 298 for a given scaling exponent across eye sizes, quantified as the standard deviation (s.d.) for the entire  
 299 range of eye diameters (grey line), and the measured range (blue dotted line). The black line  
 300 indicates the measured exponents, and the blue dashed line isometry.

301 Given these scaling parameters, we could show that the sensitivity of a single ommatidium  
302 scaled with a distinct negative allometry compared to an eye in which all structures scaled  
303 isometrically (Fig. 4A): with isometric scaling, each ommatidium of an animal with 12.5 mm  
304 body length would have a ten times reduced sensitivity compared to an animal with 25 mm  
305 body length (the median). The reduction in sensitivity given the measured scaling was only  
306 30%, and thus seven times higher than for isometric scaling. Moreover, the 95% confidence  
307 intervals still included the sensitivity value of the median sized animal, indicating that there is  
308 a negligible difference in sensitivity between animals differing in size by a factor of 2.

309 For the estimate of spatial resolution, our model showed that the photoreceptor acceptance  
310 angle of animals of 12.5 mm body was 20% larger compared to the median animal of 25 mm  
311 body length – with confidence intervals not overlapping the median (Fig. 4B). This represented  
312 a distinct difference from isometric scaling, which did not predict any differences from a median  
313 sized animal, because both the rhabdom diameter and focal length scaled isometrically in this  
314 case. The optical limitation of spatial resolution, the half-width of the fundamental mode of the  
315 point spread function (PSF) which causes diffraction at a single facet lens (see equation 4,  
316 Methods), scaled so that smaller eyes had a relatively smaller diffraction blur circle than they  
317 would have had with isometric scaling (Airy disc, Fig. 4C).

318

### 319 **The scaling of facets and rhabdoms minimised differences in the eyes' optical function** 320 **across body sizes**

321 We next assessed how the observed scaling exponents of the inter-facet and rhabdom  
322 distance determined the performance of eyes across sizes, compared a range of hypothetical  
323 scaling exponents representing negative and positive allometry, as well as isometry. We  
324 focused on these two structures, because they diverged strongly from isometry with eye size  
325 and scaled with very similar exponents, so that a common exponent could be assumed for  
326 modelling (0.48 for facet diameter, 0.47 for rhabdom diameter, average of 0.475 indicated as  
327 the black line in Fig. 4D-F). The focal and rhabdom lengths, which also contribute to the acuity  
328 and sensitivity of the eye, scaled isometrically with eye size. We calculated the ommatidial  
329 sensitivity and rhabdom acceptance angle as before, across a range of possible allometric  
330 scaling parameters for a range of eye sizes (Fig. 4D-E). We also performed this calculation for  
331 the eye parameter (Fig. 4F, Methods: equation 6), a measure of the eyes' optimisation for  
332 sensitivity or spatial acuity (smaller values suggest optimisation for acuity, large values for  
333 sensitivity).

334 For ommatidial sensitivity, isometric or positive allometric scaling resulted in distinctly higher  
335 sensitivity in larger than in smaller eyes (Fig. 4D). This strong divergence decreased down to  
336 a scaling exponent of approximately 0.3, below which the sensitivity was moderately higher in  
337 smaller than larger eyes. The observed scaling exponents of 0.48 for the facet diameter and  
338 0.47 for the rhabdom diameter (average of 0.475 indicated as the black dashed line in Fig. 4D-  
339 F) yielded a moderate difference in sensitivity across eye sizes, as also described in Fig. 4A.  
340 A very different performance for small and large eyes was obtained for the rhabdom  
341 acceptance angle, where larger animals would have coarser angles than smaller ones for a  
342 scaling exponent above 1, and vice versa below 1. The same acceptance angle was predicted  
343 for all eye sizes with isometric scaling (Fig. 4E). Finally, the eye parameter, flipped in its effect  
344 for smaller and larger eyes at scaling exponents close to those measured in hawkmoth eyes  
345 (Fig. 4F): for scaling exponents higher than 0.5, larger eyes are optimised more strongly the  
346 sensitivity, and this was also the case for smaller eyes for scaling exponents below 0.5. Across  
347 all three eye performance values, the scaling exponents observed in the eyes of *M. stellatarum*  
348 reduced the variance in sensitivity and eye parameter across eyes of different sizes compared

349 to isometric scaling (Fig. 4G, I): the observed scaling exponents were close to the overall  
350 minimum of variance across eyes for sensitivity (Fig. 4H), while they fell right into the minimum  
351 for the eye parameter (Fig. 4I). This indicates that the scaling of facet and rhabdom diameters  
352 in the superposition compound eyes of hummingbird hawkmoths are optimised to reduce the  
353 variance in eye performance across eye and body sizes.

354

## 355 Discussion

356 In this study, we used 3D X-ray microtomography to provide the first quantification of allometric  
357 scaling of the morphological and functional features of a superposition compound eye. We  
358 revealed that the overall scaling of the hummingbird hawkmoth's eye with body size was  
359 negatively allometric, as in many other insects. Even though the superposition optics provides  
360 a generally higher sensitivity to light than the optics of apposition compound eyes of a similar  
361 size, we found that non-isometric scaling reduced the loss in sensitivity in the smaller eyes of  
362 smaller individuals even further. Overall, the allometric scaling of the hawkmoths' eye  
363 parameter minimises differences in absolute sensitivity and spatial acuity across eye and body  
364 sizes.

### 365 Local inhomogeneities in hummingbird hawkmoth superposition eyes.

366 To quantify the allometric scaling of hummingbird hawkmoth superposition eyes, we undertook  
367 the first 3D structural characterisation of these eyes, which revealed some unexpected  
368 features of their visual system. It has been described previously that, unusually for optical  
369 superposition compound eyes (Exner, 1891; Meyer-Rochow & Gál, 2004), hummingbird  
370 hawkmoth compound eyes are inhomogeneous (Warrant et al., 1999). Unlike the spherical  
371 eyes of their nocturnal relatives (for example *Deilephila elpenor*, (Stöckl et al., 2016b)), their  
372 cornea and retina are locally flattened, particularly in the anterior-posterior axis. Furthermore,  
373 facet and rhabdom diameters are inhomogeneously distributed across the eye (Figs. 2,3),  
374 reminiscent of the local acute zones in apposition compound eyes (Land & Eckert, 1985; Land,  
375 1989; Straw et al., 2006; Taylor et al., 2019)). Our results confirmed previous data obtained  
376 using tissue sections of a band of increased facet diameter along the lateral midline of the eye  
377 (Warrant et al., 1999). In addition, we revealed that the largest facets in the hawkmoth eye are  
378 positioned at the posterior edge of the eye, extending over the entire dorso-ventral axis. These  
379 facets were nearly 30% larger than the average facet diameter across the eye, suggesting that  
380 increased sensitivity in the posterior visual field is of high importance to the hawkmoths. This  
381 might serve to recognise approaching predators as early as possible, especially while  
382 hawkmoths are at their most vulnerable, hover-feeding from flowers (Stöckl & Kelber, 2019;  
383 Wasserthal, 1993). Our data also provides evidence for two classes of facets in the eye of  
384 hummingbird hawkmoths: the main facets of the eye, and a group of distinctly smaller facets  
385 around its perimeter (Fig. 2A) that are covered in scales in intact hawkmoths. These two groups  
386 are visible as two clear peaks in the facet diameter histograms (Fig. 2C, S.4A). The fact that  
387 the small perimeter facets did not scale with eye size (Fig. S4C), while main facets did (Fig.  
388 2D), further suggests they are unlikely to be optically functional, but instead have a structural  
389 role. More research into the optical axes and focussing properties of these small facets will be  
390 required to elucidate whether they do play a functional, or a purely structural role.

### 391 Anatomical existence of ommatidia in hummingbird hawkmoth eyes.

392 Unexpectedly, our findings call into question an interpretation of previous anatomical findings  
393 from hummingbird hawkmoth eyes, namely the suggestion they lack true ommatidia in the  
394 developmental and functional sense, because rhabdom density is up to four times higher than  
395 facet density in the frontal acute zone (Warrant et al., 1999). In the retinas in which we fully  
396 reconstructed the positions of all rhabdoms, we did not observe this effect (Fig. 3). On the  
397 contrary, rhabdoms were spaced more widely in the fronto-ventral part of the eye than the  
398 dorsal hemisphere (Fig. 3A). The close match of identified facets and rhabdoms in the fully  
399 reconstructed eyes suggests that anatomically, although not necessarily functionally, the  
400 optical and receptive elements form a single unit in the eye of hummingbird hawkmoths. The  
401 denser rhabdom packing in the frontal eye observed previously using ophthalmoscopic  
402 measurements might thus have been an optical effect. The rounded frontal cornea focusing

403 light onto a very flat frontal retina could potentially produce a magnification of the focused  
404 image, leading to increased spatial resolution without a denser rhabdom packing. Future  
405 optical modelling will have to reveal whether this hypothesis holds, while developmental  
406 investigations might unravel how the highly inhomogeneous distribution of facet and rhabdom  
407 mosaics emerges.

#### 408 **Scaling of eye size compared to other insects.**

409 The scaling of the superposition eyes of hummingbird hawkmoths followed the same general  
410 trend described for the apposition eyes of other insect groups: they scaled negatively allometric  
411 with body size (bees: (Jander & Jander, 2002; Spaethe, 2003; Streinzer & Spaethe, 2014;  
412 Taylor et al., 2019), ants: (Perl & Niven, 2016a; Zollikofer et al., 1995), butterflies: (Merry et al.,  
413 2006; Rutowski, 2000), and flies (Currea et al., 2018). The scaling exponent we observed in  
414 hawkmoths (average: 0.55) was slightly larger than in bumblebees (0.45, (Taylor et al., 2019)),  
415 and fell well within the ranges described for ants (Perl & Niven, 2016a) and fruit flies (Currea  
416 et al., 2018). Interestingly, head size scaled isometrically in the hawkmoths, thus resulting in  
417 proportionally smaller heads than eyes in smaller individuals. In line with this, overall brain size  
418 and optic lobe size also scales isometrically in this hawkmoth species (Stöckl et al., 2016a),  
419 suggesting separate growth regulation for head and brain size on one hand, and eye size on  
420 the other hand.

421 The comparison of morphological structures related to visual sensitivity between hawkmoths  
422 and previously studied insects is of particular interest, since the hawkmoths' superposition  
423 compound eyes provide high visual sensitivity due to its specialised light-collecting optics  
424 (Exner, 1891; Warrant & Nilsson, 1998). We hypothesised that the trend to larger sensitivity in  
425 larger apposition compound eyes, as seen in bumblebees (Spaethe, 2003; Taylor et al., 2019),  
426 would be less pronounced in the hummingbird hawkmoth, where sensitivity might be under  
427 less selection pressure because the superposition pupil increases light capture by 200-times  
428 (Stöckl et al., 2017c; Warrant et al., 1999). Surprisingly, the opposite was the case: the  
429 allometric scaling exponent of the facet diameter with eye size was distinctly smaller than in  
430 bumblebees (0.71 (Taylor et al., 2019)) and smaller than in fruit flies (0.57 (Currea et al.,  
431 2018)). The consequence of the relatively increased facet and rhabdom diameters, in  
432 combination with isometrically scaling focal and rhabdom lengths, was a distinctly increased  
433 ommatidial sensitivity in smaller eyes compared to isometric scaling (Fig. 4A). Thus, compared  
434 to insects with less light-sensitive apposition eyes (Currea et al., 2018; Spaethe, 2003; Taylor  
435 et al., 2019), the highly sensitive superposition compound eyes of hawkmoths had the  
436 strongest optimisation for single-ommatidia sensitivity.

#### 437 **Benefits of relatively increased facets and rhabdoms in superposition eyes.**

438 While the investment in high sensitivity might seem counterintuitive, one needs to consider that  
439 increased facet and rhabdom diameters do not just support ommatidial sensitivity, but can also  
440 improve spatial acuity if the eye is diffraction limited (Land et al., 1997; Snyder, 1977; Snyder  
441 et al., 1977). The strongly negative allometric scaling of the facet diameter would reduce the  
442 size of single-facet based diffraction blur compared to isometric scaling (Fig. 4C). This scaling  
443 also results in relatively increased rhabdom diameters in small individuals, which further limits  
444 potential light-leakage effects into neighbouring ommatidia due to wave-guiding in the  
445 rhabdoms (Warrant et al., 2007), because the rhabdom diameters remain several times larger  
446 than the wavelength of visible light (Fig. 3C). Light leakage is further prevented by the tracheal  
447 sheet around each photoreceptor unit (Warrant et al., 1999).

448 While previous work suggests that the diffraction blur caused by a single facet in a compound  
449 eye linearly adds to the photoreceptor acceptance angle (Snyder, 1979), and thus  
450 compromises spatial resolution, this assumption does not seem to hold for superposition  
451 compound eyes (Stavenga et al., 2006), nor indeed for apposition compound eyes (Stavenga,  
452 2003; Warrant & McIntyre, 1993). In superposition compound eyes, the interaction of partially  
453 coherent light waves focused on a single rhabdom causes complex diffraction patterns that  
454 depend on the number of ommatidia in the superposition pupil (Stavenga et al., 2006). This  
455 effect decreases the extent of the blur resulting from diffraction, and might thus release  
456 superposition compound eyes from the diffraction limitations on spatial acuity that are imposed  
457 by single facets. If this was indeed the case for hummingbird hawkmoth eyes, which future  
458 optical modelling studies need to confirm, the relatively enlarged facets in smaller hawkmoths  
459 might not contribute to improved spatial acuity by decreasing the half-width of the diffraction  
460 blue compared to isometric scaling (Fig. 4C).

461 It is furthermore important to consider that visual sensitivity does not just set the absolute  
462 detection limits of the eye, but also determines how fine contrasts a visual system can resolve  
463 (Land et al., 1997; Snyder, 1977). Thus, while sensitivity is high due to the eye design in  
464 hawkmoths, and these diurnal insects can still see (Stöckl et al., 2017c) and perform visual  
465 behaviours even at moonlight intensities (Stöckl et al., 2017b), the observed scaling might  
466 serve to maximise sensitivity for the purpose of retaining high contrast resolution in small  
467 hawkmoths. One benefit of high contrast sensitivity even for diurnal insects is the detection of  
468 small objects, which is ultimately restricted by the sensitivity of individual photoreceptive units  
469 (Rigosi et al., 2017). Furthermore, high contrast sensitivity paired with high spatial resolution  
470 might be particularly adaptive for hovering insects, as it allows them to resolve motion cues  
471 both at slow hovering and fast forward flight speeds (O'Carroll et al., 1996). Thus, allometric  
472 scaling of facets and rhabdoms to retain high contrast sensitivity in small hawkmoths might  
473 provide benefits for spatial and motion tasks, on top of the high absolute sensitivity that their  
474 superposition compound eyes provide.

#### 475 **Optimising eye performance across scales.**

476 One striking hypothesis for the scaling of the different optical structures emerged when we  
477 assessed how the observed scaling affected the performance of the hawkmoth eye compared  
478 to other possible scaling coefficients. The measured scaling exponents reduced the variation  
479 in sensitivity and spatial acuity across eye sizes, compared to isometric scaling. Indeed, they  
480 optimised the eye parameter very close to the minimum in variation across scaling factors,  
481 meaning that the eyes of larger and smaller hawkmoths varied the least possible in their spatial  
482 acuity and sensitivity (Fig. 4). This likely benefits the subsequent processing of information  
483 from the eyes, because processing strategies can be largely retained across size ranges –  
484 particularly with respect to the processing that affects spatial resolution and visual sensitivity  
485 (Stöckl et al., 2017a; Stöckl et al., 2020; Warrant, 1999). As discussed above, scaling that  
486 changes the contrast and spatial properties of the visual system might alter the perceptual  
487 thresholds for object or motion detection, for example, and thus require subsequent  
488 adjustments in the visual circuits to enable individuals of different sizes to successfully perform  
489 visual behaviours. Motion vision provides an interesting case, because the spatial and  
490 temporal properties of the visual input are tightly entwined in the motion percept (Borst &  
491 Egelhaaf, 1989). Consider, for example, two hummingbird hawkmoths with different body  
492 sizes, and thus with different spatial acuity due to allometric scaling, flying at the same speed  
493 in the same environment. Their neuronal responses to motion will be different, because motion-  
494 sensitive neurons are temporal frequency tuned, and the temporal frequencies they observe  
495 will differ depending on the spatial sampling base of the eye (Borst & Egelhaaf, 1989). How

496 then, would the motion vision system be adjusted to optimally code motion in the velocity range  
497 these insects experience – or does the adjustment take place on the behavioural side, so that  
498 moths with higher spatial acuity fly at lower speeds than those with lower acuity? Scaling the  
499 eye so that changes in spatial acuity and contrast sensitivity are minimised between large and  
500 small individuals, as observed in the hummingbird hawkmoths, will minimise the need for such  
501 behavioural or physiological adjustments, and thus markedly simplify the subsequent visual  
502 processing across body size ranges.

503

### 504 **Adaptive consequences of eye scaling in solitary and social insects.**

505 The reduction of variation in sensitivity and acuity across hawkmoth sizes also suggests that  
506 larger and smaller hawkmoths would have similar visually-driven behavioural abilities. In terms  
507 of spatial acuity, this is supported by recent findings, which show no difference in spatial  
508 resolution between large and small hawkmoths in an optic flow task (Grittner et al., 2021).  
509 Given that the estimated decrease in the photoreceptor acceptance angle in the smallest  
510 tested hawkmoths was 15% lower than that in an 80% larger moth (Fig. 4B), and the range of  
511 spatial frequencies the hawkmoths responded to behaviourally (Grittner et al., 2021), the lack  
512 of a behavioural phenotype might not be surprising. This is in stark contrast to bumblebees,  
513 where the spatial resolution improved by 30-50% (measured as the inter-ommatidial angle) in  
514 50% larger bumblebees. This distinct scaling of visual sensitivity with body size manifests in  
515 behaviour: larger bees forage at lower light intensities (Kapustjanskij et al., 2007) and detect  
516 smaller point-targets than smaller ones (Spaethe, 2003; Streinzer et al., 2016). In general,  
517 there might be a higher tolerance for variations in eye performance across scales in social  
518 insects, since the unit of selection is the colony (Korb & Heinze, 2004), not the individual. In  
519 bumblebees, the workers that leave the nest to forage are typically larger individuals (Cumber  
520 1949), so that a scaling of sensitivity benefits the colony in foragers with a higher sensitivity,  
521 while the smaller individuals can take up other tasks in the colony. In hawkmoths, where the  
522 unit of selection is the individual, a strong scaling of visual sensitivity with eye size would be  
523 mal-adaptive to a distinct proportion of the population, which might therefore have a lower  
524 tolerance for performance scaling with eye size. Future comparative work is required to resolve  
525 which role solitary lifestyle, phylogenetic heritage and eye design play in the allometric scaling  
526 we found in hummingbird hawkmoths.

527

### 528 **Conclusion**

529 Insect compound eyes provide an ideal model to study how miniature optical systems optimise  
530 their performance across scales. In this study, we provide the first quantification of the  
531 allometric scaling of the morphology and functional characteristics of a superposition  
532 compound eye. We revealed that this eye type follows the same trend for negative allometry  
533 of eye size with body size as many other insects. Our results demonstrate how eye scaling  
534 benefits the performance of the eye in terms of sensitivity and spatial resolution. By showing  
535 that the measured scaling factors in hummingbird hawkmoths minimise the variation in eye  
536 performance across eye sizes, we open the field for future investigations into how allometric  
537 scaling optimises eye performance in different species and optical systems.

538

## 539 **Methods**

### 540 **Animal measurements**

541 Hawkmoths (males and females) were kept on a 14:10h light/dark cycle in flight cages (60 cm  
542 x 60 cm x 60 cm) and fed with artificial feeders (Pfaff & Kelber, 2003) that contained a 20%  
543 sucrose-water-solution for several days before being used in experiments. To investigate the  
544 scaling of eye morphology, we selected a total of 25 individuals with a wide range of body sizes  
545 (Fig. 1D). We weighed all animals before the preparation of eyes, and photographed every  
546 animal to determine their body and wing size using the Fiji software (Schindelin et al. 2012).  
547 Total body length was measured from their anterior to posterior extent, the thorax width was  
548 measured from wing-base to wing-base, the total wing length was measured from the base to  
549 the tip of the wing for both wings and averaged, and the inner wing length was measured from  
550 the base to the inner turning point of the wing (see Fig. S1 for descriptions of all  
551 measurements). For most comparisons, we relied on the body length as a measure of body  
552 size, as this had the highest correlation with other body size parameters, such as the weight,  
553 and the size of the wings (Fig. S1). Some data in this study did not include body length  
554 measurements, but only outer wing length. To obtain an estimate of body length we used the  
555 highly linearly correlated relation between body and wing length in hummingbird hawkmoths  
556 (Fig. S1, see also (Kihlström et al., 2021)), by computing the allometric scaling between the  
557 two parameters (see *Allometry calculations*) and solving the equation for body length.

### 558 **Head and eye preparations**

559 We prepared the eyes of 16 hawkmoths for microtomographic imaging. For that, we retrieved  
560 the heads of cold-anesthetized hawkmoths, and removed their antennae and the dorsal part  
561 of their head capsule, as well as the mouth parts, with a sharp razor blade. We furthermore  
562 removed the lateral tip of the left eye to improve the impregnation of the sample with fixative  
563 solution and resin. This was particularly important since the large clear zone of the  
564 superposition compound eyes, and the high amount of trachea in and around the brain and  
565 retina posed a considerable challenge for fixation and embedding of the tissue. We  
566 immediately fixed the dissected samples in 3% paraformaldehyde, 2% glutaraldehyde, and 2%  
567 glucose in phosphate buffer (pH ~7.3, 0.2M) for 3 hr, and then washed these in phosphate  
568 buffer before immersing them in 2% OsO<sub>4</sub> for 1 hr to enhance the X-ray absorption contrast  
569 (Ribi et al., 2008). After washing in buffer again, the samples were dehydrated with a graded  
570 alcohol series, and acetone was used to transition the samples to epoxy resin (Agar 100, Agar  
571 Scientific) in multiple steps of increasing concentration (see (Stöckl et al., 2016b)). The  
572 samples in wet epoxy were placed with their dorsal side facing up on cured Epoxy mounts and  
573 cured in an oven at 60°C for ~48 hr.

### 574 **X-ray microtomography imaging**

575 Tomographic imaging of moth heads was performed at the Diamond-Manchester Imaging  
576 Beamline I13-2 (Pešić et al., 2013; Rau et al., 2011) at the Diamond Light Source UK (proposal  
577 MT13848). Fixated heads were imaged using 4 x total magnification (with an effective pixel  
578 size of 1.625 µm) using a pco.edge 5.5 (PCO AG) detector with a 50 mm propagation distance.  
579 For further details, see Taylor et al. (2019).

### 580 **Eye measurements**

581 The scan data was compressed from 32 bit to 8 bit, and cut to contain only the region of  
582 interest, using Dristhi (Limaye, 2012). The subsequent data analysis was performed on  
583 reconstructed 3D volumes in Amira (Release 6.8, Thermo Fisher Scientific). Data was  
584 extracted only from specimen that had sufficiently high quality of preparation and scanning to



585 reliably extract the following measures. The *Source Data* file provides an overview of which  
586 data was extracted for each specimen. Using the *3D measurement* tool, we extracted the  
587 anterior-posterior and dorso-ventral diameters of each eye (Fig. 1E,F, orange lines), as well  
588 as three measures of head size: the dorso-ventral and lateral extents of the mouth-part base,  
589 the dorso-ventral extent of the right optic lobe (Fig. S2A). A subset of eye diameters (9 animals,  
590 highlighted in the respective figures) was measured by photographing the eye laterally through  
591 a stereoscope with a scale bar.

592 The median facet diameters in this subset of data were determined from corneal imprints with  
593 nail polish (Stöckl et al., 2016b), while all other facet diameters were measured on the 3D  
594 volumetric data in Amira: to this aim, the data was rendered using the *isosurface* tool with an  
595 individually adjusted brightness histogram, to optimally resolve the surface of the eye (for  
596 example Fig. 1A,B). Then, 60-70 measurements spaced in regular distances over the entire  
597 eye were performed. Each of these measurements comprised a group of seven facets (one  
598 central facet and its six neighbours), for which three measurements were performed, spanning  
599 from the outer edge of a facet to the opposing facet beyond the central one (see Fig. 2B, and  
600 (Taylor et al., 2019)). The results were averaged and divided by the number of facets spanned  
601 (three), to obtain an average measure of the facet diameter at each of the 60-70 positions on  
602 the retina. These measurements formed the basis for the inter-facet-distance histograms (Fig.  
603 2C, S4A). In addition, we also reconstructed the positions of all corneal facets in two selected  
604 eyes and used their coordinates to calculate the inter-facet distances for all facets in these  
605 eyes (Fig. 2A). Both the complete reconstruction, as well as the lower resolution sampling of  
606 facet distances revealed a bimodal distribution of facet diameters (Fig. 2C, Fig. S4A). The two  
607 peaks of the distribution represent the main facets of the eye and a ring of distinctly smaller  
608 structural facets around the eyes' perimeter, which are covered by scales in intact hawkmoths.  
609 In the subsequent allometric analysis we separated the two facet groups using a cut-off of 20  
610  $\mu\text{m}$ , because their scaling with eye size differed.

611 We used the same measurement strategy to measure the inter-rhabdom distances in the  
612 retina. To this aim, we virtually removed the distal portion of the eye to reveal the distal surface  
613 of the retina in the lateral eye (where rhabdoms were most clearly separable). Here, we  
614 performed 20 measurements (containing three measurements each as for the facet distances),  
615 which were spaced 7-8 rhabdoms apart. We calculated the inter-rhabdom distances as for  
616 inter-facet distances (Fig. 3C). In the two eyes in which all facet positions were reconstructed,  
617 we virtually exposed the entire distal surface of the retina and reconstructed the position of  
618 every resolvable rhabdom (Fig. 3A,B).

619 We further analysed a variety of functional parameters on optical sections through the anterior-  
620 posterior median (horizontal section, Fig. 1B) and dorso-ventral median (frontal section,  
621 Fig. 1C) of the eye. For each eye and section orientation, we conducted 10 evenly spaced  
622 measurements of cornea thickness (Fig. S3B), crystalline cone length (Fig. S3C), and distance  
623 between retina and cornea (Fig. S5A,D). To assess whether the curvature of the eye differed  
624 with eye size, we performed nine evenly spaced measurements of the eye radius, whose  
625 medial border was defined by the medial edge of the cornea. The nodal point for the  
626 measurements was placed in the centre of this line, forming the first two measurements. From  
627 there, a measurement perpendicular to the medial measurements was performed to the distal-  
628 most extent of the cornea, and three further measurements were spaced evenly between these  
629 on both sides (Fig. 1I, S3E). Using these, we calculated the ratio between the middle radius,  
630 and the two lateral-most ones next to the edge radii (Fig. 1H, S3F). If the overall curvature of  
631 the cornea differed, for example if the eye became flatter as animals became larger, the ratio  
632 should decrease, as the central radius would decrease in length relative to the lateral ones. To  
633 assess potential difference of cornea curvature with eye size, we computed the allometric  
634 scaling of the curvature ratio with eye diameter.

635 Finally, we calculated an estimate of the number of facets per eye as the corneal surface area  
636 divided by the facet diameter. Since we were not able to reconstruct the surface area of all  
637 eyes, we derived a scale factor from the eight eyes with fully reconstructed corneal surfaces  
638 that allowed us to estimate the eye surface area from the eye diameter – which was possible  
639 since the overall curvature of the cornea did not differ (Fig. 1H, S3F):

$$est. surface area = 2.25 \pi \left( \frac{eye\ diameter}{2} \right)^2 \quad (1)$$

640

641 We calculated the number of facets per eye as the estimated surface area divided by the  
642 median functional facet size. This measure does not take into account the number of structural  
643 facets but provides a conservative estimate for the scaling of the functional facets in the eye.

#### 644 **Allometry calculations**

645 To assess the scaling relationship between different eye and body sizes, we first tested for a  
646 significant linear correlation between the two log-transformed parameters in questions, by  
647 means of the Pearson correlation coefficient ( $R$ ). Only if a significant log-linear correlation was  
648 found ( $p < 0.05$ ), we proceeded to test the allometric scaling. For this, we used Model II (reduced  
649 major axis) regression implemented in the *gmregress* script for MATLAB (A. Trujillo-Ortiz,  
650 [www.mathworks.com/matlabcentral/fileexchange/27918-gmregress](http://www.mathworks.com/matlabcentral/fileexchange/27918-gmregress), retrieved March 19,  
651 2020). This provided the scaling exponent  $b$  and the scaling constant  $a$  of the allometric  
652 relationship

$$y = ax^b \quad (1)$$

653 Fitted to the parameters in the log-transformed version of the equation:

$$\log(y) = \log(a) + b \log(x) \quad (2)$$

654 The scaling exponent  $b$  describes the slope of the linear relationship, and the log-transformed  
655 scaling constant  $a$  describes the y-axis intercept (Warton et al., 2006).

#### 656 **Acuity and sensitivity calculations**

657 To understand how the scaling of the optical and sensory components of hawkmoth eyes  
658 contribute to their function, we used the measured allometric relations of eye structures to  
659 calculate how the diffraction limit, acceptance angle and sensitivity of a single ommatidium  
660 scale with body and eye size of the hawkmoths. To this aim, we calculated how these  
661 measures differed relative to an average individual with 25 mm body length (Fig. 4). We applied  
662 all parameters in the following formula, which are not constant for animals of varying body  
663 sizes, and constants where necessary to retain proportionality, and scaled their values  
664 according to the measured allometric relationships with body size. To obtain confidence  
665 intervals for these calculations, we applied the upper and lower confidence intervals of each  
666 scaling exponent and intercept to obtain an estimate of the lowest and highest value of each  
667 eye parameter for each animal size.

668 Since the rhabdom diameter estimated from the inter-rhabdom distance and previously  
669 measured by (Warrant et al., 1999) distinctly exceeded the average wavelength of visible light,  
670 we calculated the half-width of the point-spread function  $hw_{PSF}$  (Airy disc) created by the optics  
671 of each facet (Fig. 4C) as

$$hw_{PSF} = \lambda/D \quad (3)$$

672 according to (Land et al., 1997; Warrant et al., 2007). We calculated the rhabdom acceptance  
673 angle  $\Delta\rho$  (Fig. 4B) according to (Land et al., 1997),

$$\Delta\rho = \sqrt{(d/f)^2} \quad (4)$$

674 The sensitivity  $N$  of each ommatidium (Fig. 4A) was calculated according to (Warrant &  
675 Nilsson, 1998) as proportional with the following eye parameters:

$$N \sim \Delta\rho^2 D^2 \left( \frac{kl}{2.3 + kl} \right) \quad (5)$$

676 We calculated the eye parameter  $P$  (Fig. 4F) as a measure for the investment of the eye in  
677 sensitivity (larger values) or acuity (smaller values) according to (Snyder, 1977):

$$P = (d/f) D \quad (6)$$

678 Where  $\lambda$  is the light's wavelength, set to 500 nm,  $k$  is the absorption coefficient of the  
679 photoreceptor ( $0.0067 \mu\text{m}^{-1}$ ),  $D$  is the facet diameter,  $d$  is the rhabdom diameter,  $l$  is the  
680 rhabdom length, and  $f$  is the focal length of the eye. The focal length of the eye cannot be  
681 determined directly from anatomical measures in aspherical superposition compound eyes  
682 (Warrant, 1999). We could assume the same scaling coefficients for the focal length as for the  
683 eye diameter for the following reason: the focal length in superposition compound eyes is  
684 principally measured as the distance from the nodal point of the eye to the tip of the retina  
685 (Land et al., 1997). The nodal point of the eye depends on the radius of the eye, which scaled  
686 isometrically with eye size (Fig. 1H, S3F). The distance from the nodal point to the tip of the  
687 retina depends on the radius of the eye, and the distance of the retina to the cornea. The latter  
688 remained constant across animals of different sizes (Fig. S5), so that the scaling of the focal  
689 length was determined by the eye radius, which in turn scaled isometrically with eye diameter.  
690 We therefore used the eye diameter scaling coefficient for the focal length and fitted the  
691 intercept to an average focal length of 0.375 mm (Warrant et al., 1999).

692 We used the computational estimations of eye function to assess how the descriptors of eye  
693 function varied with different allometric scaling. To this aim, we calculated the ommatidial  
694 sensitivity (equation 5) and rhabdom acceptance angle (equation 4), as well as the eye  
695 parameter (equation 6) for a range of allometric scaling exponents across many eye sizes  
696 (corresponding to the body sizes in Fig. 4A-C). Since the focal and rhabdom lengths scaled  
697 isometrically, and the facet and rhabdom diameters scaled with very similar exponents (Figs.  
698 2D, 3C), we calculated the eye performance measures by applying the same scaling exponent  
699 factor to both the facet and rhabdom diameter, while retaining the focal and rhabdom lengths  
700 at isometry (Fig. 4D-F). We then assessed the variance of the given eye function descriptors  
701 across eye size for each scaling exponent as the standard deviation (Fig. 4G-I).

702

## 703 **Acknowledgements**

704 The authors would like to thank Pierre Tichit for support with data acquisition and discussion  
705 of data analysis, and Ola Gustafsson, Eva Landgren and Carina Rasmussen for support with  
706 the sample preparation. We would like to thank Eric Warrant for helpful discussion of the optical  
707 modelling. We acknowledge funding to A.S. by the Würzburg Graduate School of Life Sciences  
708 PostdocPlus Programme and the German Research Council (DFG: STO 1255 2-1), and to  
709 E.B. by the Air Force Office of Scientific Research (FA8655-12-1-2136), the Vetenskapsrådet  
710 (2014-4762) and the Carl Tryggers Stiftelse för Vetenskaplig Forskning (CTS15:38).

711

## 712 **Competing interests**

713 The authors declare no competing interests.

714

## 715 References

- 716 Bagheri, Z. M., Jessop, A.-L., Kato, S., Partridge, J. C., Shaw, J., Ogawa, Y., & Hemmi, J. M.  
717 (2019). A new method for mapping spatial resolution in compound eyes suggests two visual  
718 streaks in fiddler crabs. *J. Exp. Biol.*, 223, jeb210195.
- 719 Baird, E. & Taylor, G. (2017). X-ray micro computed-tomography. *Curr. Biol.*, 27(8), R289–  
720 R291.
- 721 Blanckenhorn, W. U. (2000). The evolution of body size: What keeps organisms small?  
722 *Q. Rev. Biol.*, 75(4), 385–407.
- 723 Borst, A. & Egelhaaf, M. (1989). Principles of visual motion detection. *Trends Neurosci.*,  
724 12(8), 297–306.
- 725 Chown, S. L. & Gaston, K. J. (2010). Body size variation in insects: a macroecological  
726 perspective. *Biol. Rev.*, 85(1), 139–169.
- 727 Currea, J. P., Smith, J. L., & Theobald, J. C. (2018). Small fruit flies sacrifice temporal acuity  
728 to maintain contrast sensitivity. *Vision Res.*, 149, 1–8.
- 729 Exner, S. (1891). *Die Physiologie der facettierten Augen von Krebsen und Insecten*. Leipzig:  
730 Deuticke.
- 731 Grittner, R., Baird, E., & Stöckl, A. (2021). Spatial tuning of translational optic flow responses  
732 in hawkmoths of varying body size. *J Comp Physiol A*, 10.1007/s00359-021-01530-1.
- 733 Jander, U. & Jander, R. (2002). Allometry and resolution of bee eyes (Apoidea). *Arthropod*  
734 *Struct. Dev.*, 30(3), 179–193.
- 735 Kapustjanskij, A., Streinzer, M., Paulus, H. F., & Spaethe, J. (2007). Bigger is better:  
736 implications of body size for flight ability under different light conditions and the evolution of  
737 alloethism in bumblebees. *Funct. Ecol.*, 21, 1130–1136.
- 738 Kevan, P. G. & Baker, H. G. (1983). Insects as flower visitors and pollinators. *Annual Review*  
739 *of Entomology*, 28(1), 407–453.
- 740 Kihlström, K., Aiello, B., Warrant, E., Sponberg, S., & Stöckl, A. (2021). Wing damage affects  
741 flight kinematics but not flower tracking performance in hummingbird hawkmoths. *J. Exp.*  
742 *Biol.*, 224, jeb.236240.
- 743 Korb, J. & Heinze, J. (2004). Multilevel selection and social evolution of insect societies. *Sci.*  
744 *Nat.*, 91(6), 291–304.
- 745 Kunze, P. (1972). Comparative studies of arthropod superposition eyes. *J Comp Physiol*,  
746 76(4), 347–357.
- 747 Land, M. & Eckert, H. (1985). Maps of the acute zones of fly eyes. *J. Comp. Physiol. A.*,  
748 156(4), 525–538.
- 749 Land, M. F. (1989). Variations in the structure and design of compound eyes. In *Facets of*  
750 *Vision* (pp. 90–111). Springer Berlin Heidelberg.
- 751 Land, M. F., Gibson, G., & Horwood, J. (1997). Mosquito eye design: conical rhabdoms are  
752 matched to wide aperture lenses. *Proc. R. Soc. Lond. B.*, 264(1385), 1183–1187.
- 753 Limaye, A. (2012). Drishti: a volume exploration and presentation tool. In S. R. Stock (Ed.),  
754 *SPIE 8506, Developments in X-Ray Tomography VIII*.
- 755 Merry, J. W., Morehouse, N. I., Yturralde, K., & Rutowski, R. L. (2006). The eyes of a  
756 patrolling butterfly: Visual field and eye structure in the orange sulphur, *Colias eurytheme*  
757 (Lepidoptera, Pieridae). *J. Insect Physiol.*, 52, 240–248.
- 758 Meyer-Rochow, V. B. & Gál, J. (2004). Dimensional limits for arthropod eyes with  
759 superposition optics. *Vision Res.*, 44(19), 2213–2223.
- 760 Niven, J. E. & Laughlin, S. B. (2008). Energy limitation as a selective pressure on the  
761 evolution of sensory systems. *J. Exp. Biol.*, 211(Pt 11), 1792–1804.

- 762 O'Carroll, D. C., Bidwell, N. J., Laughlin, S. B., & Warrant, E. J. (1996). Insect motion  
763 detectors matched to visual ecology. *Nature*, 382(6586), 63–66.
- 764 Perl, C. D. & Niven, J. E. (2016a). Colony-level differences in the scaling rules governing  
765 wood ant compound eye structure. *Sci. Rep.*, 6.
- 766 Perl, C. D. & Niven, J. E. (2016b). Differential scaling within an insect compound eye. *Biol.*  
767 *Lett.*, 12, 20160042.
- 768 Pešić, Z. D., Fanis, A. D., Wagner, U., & Rau, C. (2013). Éxperimental stations at i13  
769 beamline at diamond light source. *J Phys Conf Ser*, 425(18), 182003.
- 770 Pfaff, M. & Kelber, A. (2003). Ein vielseitiger futterspender für anthophile insekten. *Entomol.*  
771 *Z.*, 113, 360–361.
- 772 Proctor M, Yeo P, L. A. (1996). *The natural history of pollination*. Portland: Timber Press.
- 773 Rau, C., Wagner, U., Pešić, Z., & Fanis, A. D. (2011). Coherent imaging at the diamond  
774 beamline i13. *Phys. Status Solidi*, 208(11), 2522–2525.
- 775 Ribi, W., Senden, T. J., Sakellariou, A., Limaye, A., & Zhang, S. (2008). Imaging honey bee  
776 brain anatomy with micro-x-ray-computed tomography. *J. Neurosci. Methods*, 171(1), 93–97.
- 777 Rigosi, E., Wiederman, S. D., & O'Carroll, D. C. (2017). Visual acuity of the honey bee retina  
778 and the limits for feature detection. *Sci. Rep.*, 7.
- 779 Rutowski, R. L. (2000). Variation of eye size in butterflies: inter- and intraspecific patterns. *J.*  
780 *Zool.*, 252, 187–195.
- 781 Sibly, R. M. & Brown, J. H. (2007). Effects of body size and lifestyle on evolution of mammal  
782 life histories. *Proc. Natl. Acad. Sci.*, 104(45), 17707–17712.
- 783 Snyder, A. (1979). *Handbook of Senory Physiology*, chapter The physics of compound eyes,  
784 (pp. 225–213). Springer.
- 785 Snyder, A. W. (1977). Acuity of compound eyes: Physical limitations and design. *J. Comp.*  
786 *Physiol. A.*, 116, 161–182.
- 787 Snyder, A. W., Stavenga, D. G., & Laughlin, S. B. (1977). Spatial information capacity of  
788 compound eyes. *J. Comp. Physiol.*, 116(2), 183–207.
- 789 Spaethe, J. (2003). Interindividual variation of eye optics and single object resolution in  
790 bumblebees. *J. Exp. Biol.*, 206, 3447–3453.
- 791 Spence, A. J. (2009). Scaling in biology. *Curr. Biol.*, 19(2), R57–R61.
- 792 Stavenga, D. (2003). Angular and spectral sensitivity of fly photoreceptors. i. integrated facet  
793 lens and rhabdomere optics. *J Comp Physiol A*, 189(1), 1–17.
- 794 Stavenga, D., Foletti, S., Palasantzas, G., & Arikawa, K. (2006). Light on the moth-eye  
795 corneal nipple array of butterflies. *Proc Biol Sci*, 273(1587), 661–667.
- 796 Stavenga, D. G. (2006). Partial coherence and other optical delicacies of lepidopteran  
797 superposition eyes. *J. Exp. Biol.*, 209(10), 1904–1913.
- 798 Stöckl, A., Heinze, S., Charalabidis, A., El Jundi, B., Warrant, E., & Kelber, A. (2016a).  
799 Differential investment in visual and olfactory brain areas reflects behavioural choices in  
800 hawk moths. *Sci. Rep.*, 6, 26041.
- 801 Stöckl, A., Smolka, J., O'Carroll, D., & Warrant, E. (2017a). Resolving the trade-off between  
802 visual sensitivity and spatial acuity - lessons from hawkmoths. *Integr. Comp. Biol.*, 57(5),  
803 1093–1103.
- 804 Stöckl, A. L. & Kelber, A. (2019). Fuelling on the wing: sensory ecology of hawkmoth  
805 foraging. *J. Comp. Physiol. A.*, 205, 399–413.
- 806 Stöckl, A. L., Kihlström, K., Chandler, S., & Sponberg, S. (2017b). Comparative system  
807 identification of flower tracking performance in three hawkmoth species reveals adaptations  
808 for dim light vision. *Phil. Trans. R. Soc. Lond. B.*, 372(1717), 20160078.

- 809 Stöckl, A. L., O'Carroll, D. C., & Warrant, E. (2017c). Higher-order neural processing tunes  
810 motion neurons to visual ecology in three species of hawkmoths. *Proc. R. Soc. B.*, 284,  
811 20170880.
- 812 Stöckl, A. L., O'Carroll, D. C., & Warrant, E. J. (2020). Hawkmoth lamina monopolar cells act  
813 as dynamic spatial filters to optimize vision at different light levels. *Sci. Adv.*, 6(16),  
814 eaaz8645.
- 815 Stöckl, A. L., Ribi, W. A., & Warrant, E. J. (2016b). Adaptations for nocturnal and diurnal  
816 vision in the hawkmoth lamina. *J. Comp. Neurol.*, 524(1), 160–175.
- 817 Straw, A. D., Warrant, E. J., & O'Carroll, D. C. (2006). A bright zone in male hoverfly  
818 (*Eristalis tenax*) eyes and associated faster motion detection and increased contrast  
819 sensitivity. *J. Exp. Biol.*, 209(21), 4339–4354.
- 820 Streinzer, M., Huber, W., & Spaethe, J. (2016). Body size limits dim-light foraging activity in  
821 stingless bees (apidae: Meliponini). *J. Comp. Physiol. A.*, 202, 643–655.
- 822 Streinzer, M. & Spaethe, J. (2014). Functional morphology of the visual system and mating  
823 strategies in bumblebees (Hymenoptera, Apidae, Bombus). *Zool. J. Linn. Soc.*, 170, 735–  
824 747.
- 825 Taylor, G. J., Tichit, P., Schmidt, M. D., Bodey, A. J., Rau, C., & Baird, E. (2019). Bumblebee  
826 visual allometry results in locally improved resolution and globally improved sensitivity. *eLife*,  
827 8, e40613.
- 828 Warrant, E., Bartsch, K., & Günther, C. (1999). Physiological optics in the hummingbird  
829 hawkmoth: a compound eye without ommatidia. *J. Exp. Biol.*, 202 (Pt 5), 497–511.
- 830 Warrant, E., Kelber, A., & Frederiksen, R. (2007). *Invertebrate Neurobiology*, chapter  
831 Ommatidial adaptations for spatial, spectral and polarisation vision in arthropods., (pp. 123–  
832 154). Cold Spring Harbor Laboratory Press (CSHL): United States.
- 833 Warrant, E. J. (1999). Seeing better at night: life style, eye design and the optimum strategy  
834 of spatial and temporal summation. *Vision Res.*, 39(9), 1611–1630.
- 835 Warrant, E. J. & McIntyre, P. D. (1993). Arthropod eye design and the physical limits to  
836 spatial resolving power. *Prog. Neurobiol.*, 40(4), 413–461.
- 837 Warrant, E. J. & Nilsson, D. E. (1998). Absorption of white light in photoreceptors. *Vision*  
838 *Res.*, 38(2), 195–207.
- 839 Warton, D. I., Wright, I. J., Falster, D. S., & Westoby, M. (2006). Bivariate line-fitting methods  
840 for allometry. *Biol. Rev. Camb. Philos. Soc.*, 81(2), 259–291.
- 841 Wasserthal, L. (1993). Swing-hovering combined with long tongue in hawkmoths, an  
842 antipredator adaptation during flower visits. *Animal-plant interactions in tropical*  
843 *environments*, (pp. 77–87).
- 844 Zollikofer, C., Wehner, R., & Fukushi, T. (1995). Optical scaling in conspecific *Cataglyphis*  
845 ants. *J. Exp. Biol.*, 198(8), 1637–1646.
- 846
- 847

848 **Supplementary Figures**

849

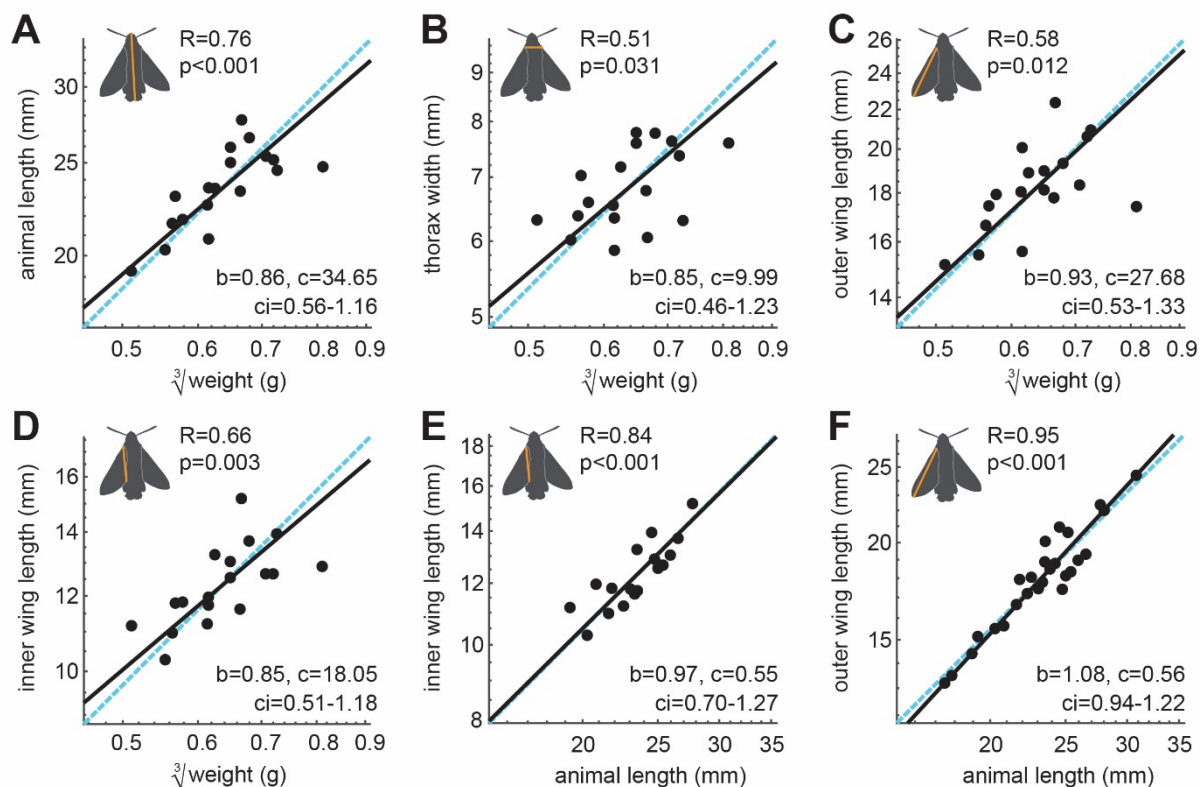

850 **Fig. S1 Allometric scaling of body size in *Macroglossum stellatarum*.**

851 Allometric scaling of the **A** anterior-posterior body length, **B** the thorax width, **C** the outer wing  
 852 length, **D** and the inner wing length with the cube-root of body weight. **E** Scaling of the inner and **F**  
 853 outer wing length with animal length. Measurements are indicated by the orange lines. **A-F** Data  
 854 from individual hawkmoths (black dots). The dashed cyan line indicates isometric scaling and the  
 855 black line represents the allometric scaling relationship.  $R$  is the Pearson correlation coefficient of  
 856 the log-transformed data, and  $p$  denotes its statistical significance. Given the significant linear  
 857 correlations in **A-F**, the allometric relationship was calculated using reduced major axis regression,  
 858 with the exponential scaling exponent  $b$ , the normalization constant  $c$ , and the confidence interval  
 859  $ci$  of  $b$ .

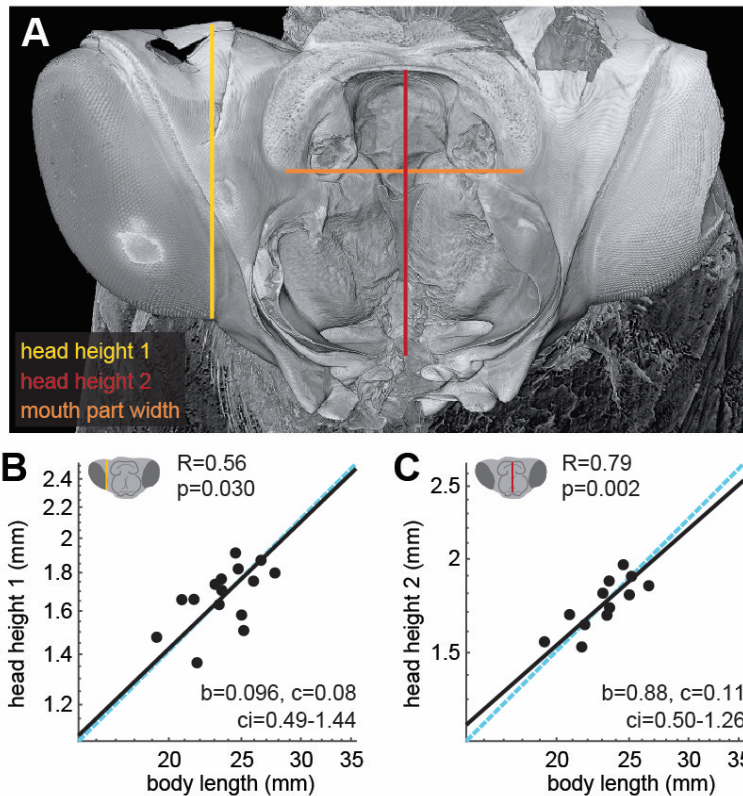

860

861 **Fig. S2 Allometric scaling of head size with body size.**

862 **A** Microtomography images of the head of *M. stellatarum*. The left eye was cut open for better  
863 penetration of the fixative, and the mouth parts, dorsal and posterior face of the head were removed  
864 as well. To assess head size, we measured the lateral extend of the mouth part base (1, Fig. 1G),  
865 the dorso-ventral extent of the mouth part base (2) and the dorso-ventral extent of the right optic  
866 lobe (3). Allometric scaling of the **B** optic lobe height, and **C** the height of the mouth-part base with  
867 body length. **B-C** Data from individual hawkmoths was measured by X-ray microtomography (black  
868 dots). The dashed cyan line indicates isometric scaling and the black line represents the allometric  
869 scaling relationship.  $R$  is the Pearson correlation coefficient of the log-transformed data, and  $p$   
870 denotes its statistical significance. Given the significant linear correlations in **A-F**, the allometric  
871 relationship was calculated using reduced major axis regression, with the exponential scaling  
872 exponent  $b$ , the normalization constant  $c$ , and the confidence interval  $ci$  of  $b$ .

873



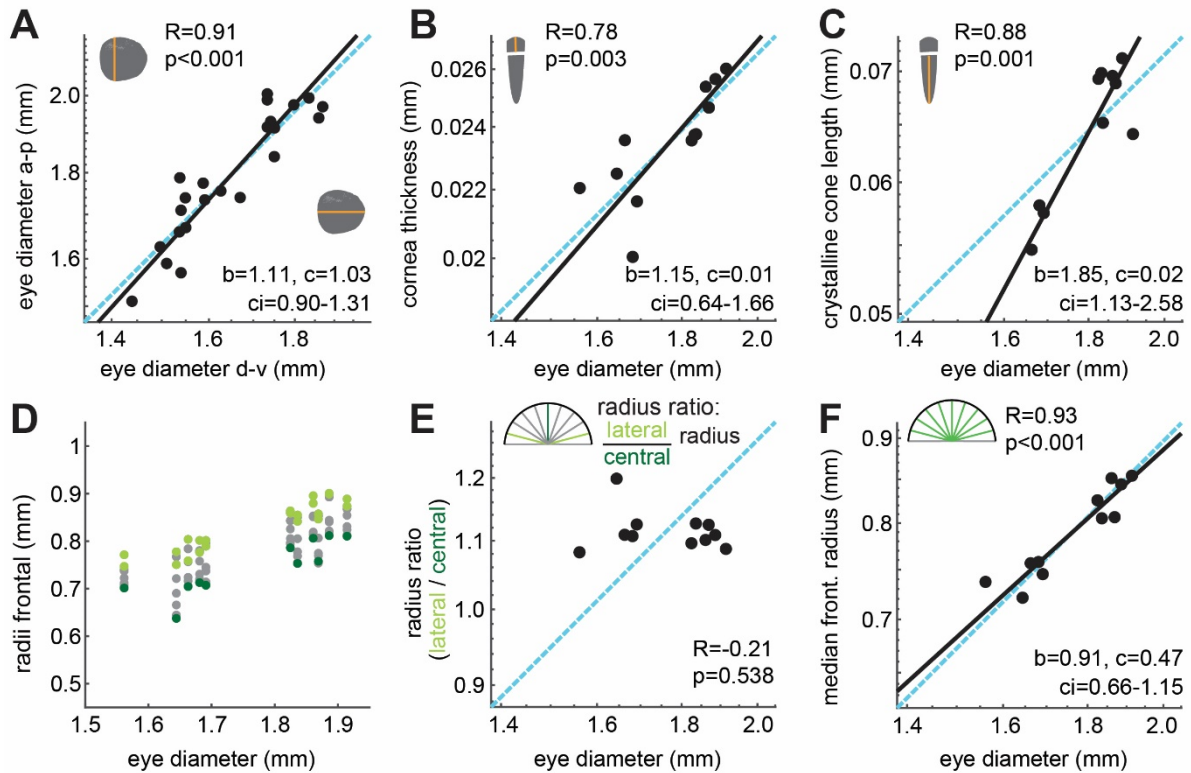

874

875 **Fig. S3 Allometric scaling cornea structures and corneal shape with eye size.**

876 Allometric scaling of the **A** anterior-posterior with dorso-ventral eye diameter, and **B** of the facet  
 877 thickness **C** crystalline cone length with eye size. **D** To test whether the curvature of the eye differed  
 878 across eye diameters, we measured the distance from the nodal point formed by the edges of the  
 879 cornea to the corneal surface for nine evenly spaced radii in frontal sections. **E** We calculated the  
 880 ratio between the average lateral radii (light blue) and the central radius (dark blue) as a proxy for  
 881 the corneas' shape and assessed its allometric scaling. **F** shows the allometric scaling of the  
 882 median of the central seven radius measurements (green) with eye diameter. **A-C,E,F** Data from  
 883 individual hawkmoths (black dots). The dashed cyan line indicates isometric scaling and the black  
 884 line represents the allometric scaling relationship.  $R$  is the Pearson correlation coefficient of the  
 885 log-transformed data, and  $p$  denotes its statistical significance. Given the significant linear  
 886 correlations in **A-C,F**, the allometric relationship was calculated using reduced major axis  
 887 regression, with the exponential scaling exponent  $b$ , the normalization constant  $c$ , and the  
 888 confidence interval  $ci$  of  $b$ .

889

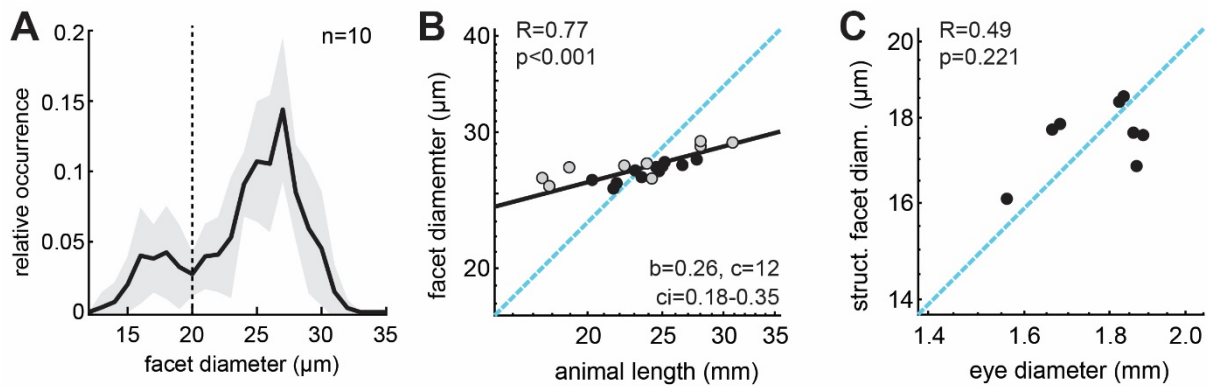

890

891 **Fig. S4 Allometric scaling of structural and functional facets.**

892 **A** Histograms of all facet diameters measured across the corneal surface of 10 eyes. The black  
 893 line represents the mean and the shaded area the standard deviation. The dashed line indicates  
 894 the threshold for separating structural from functional facets at 20  $\mu\text{m}$ . Allometric scaling **B** of the  
 895 functional facet diameter with animal length, and **C** the structural facet diameter with eye diameter.  
 896 **B-C** Data from individual hawkmoths was measured by either X-ray microtomography (black dots),  
 897 or light-microscopy (grey dots). The dashed cyan line indicates isometric scaling and the black line  
 898 represents the allometric scaling relationship.  $R$  is the Pearson correlation coefficient of the log-  
 899 transformed data, and  $p$  denotes its statistical significance. Given the significant linear correlations  
 900 in **B**, the allometric relationship was calculated using reduced major axis regression, with the  
 901 exponential scaling exponent  $b$ , the normalization constant  $c$ , and the confidence interval  $ci$  of  $b$ .

902

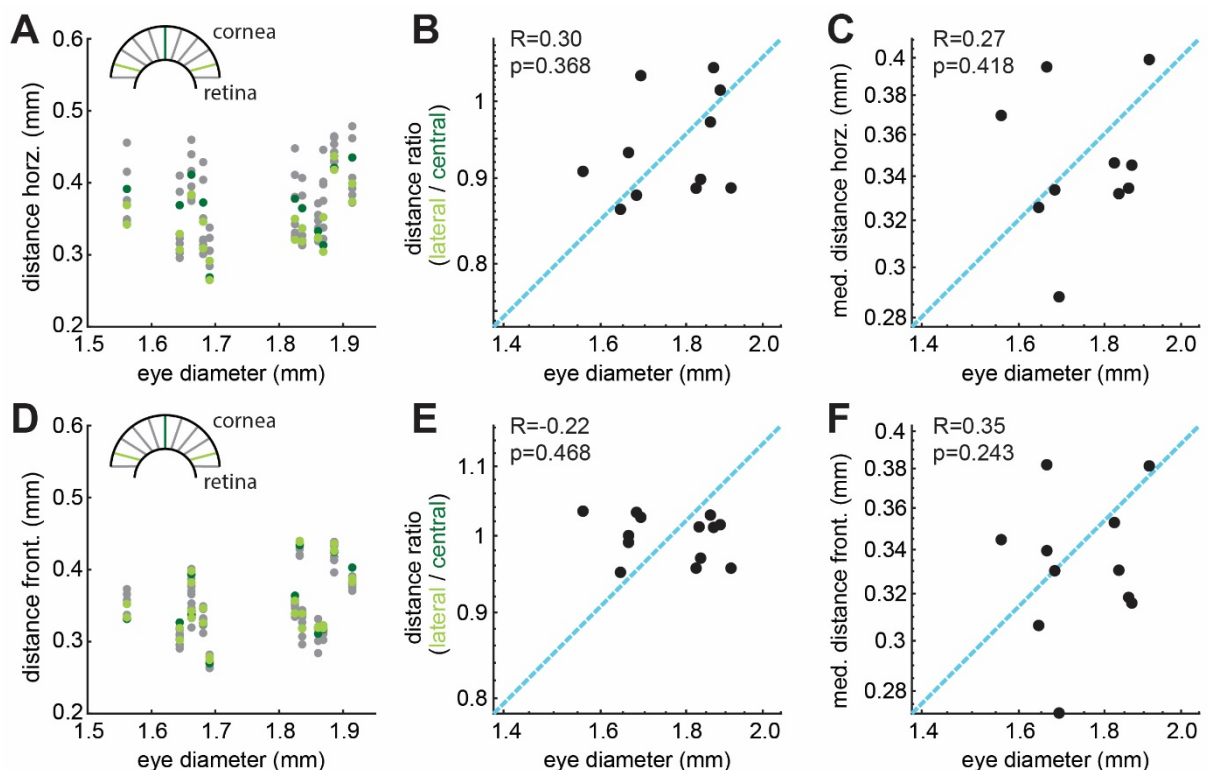

903

904 **Fig. S5 Allometric scaling of retina-cornea distance.**

905 To test whether the distance of the cornea to retina differed across eye diameters, we measured  
 906 this distance for eleven evenly spaced measurements in **A** horizontal and **D** frontal sections.  
 907 Allometric scaling of the ratio of lateral and central measurements with eye diameter from **B**  
 908 horizontal and **E** frontal sections, and of the median **C** horizontally and **F** frontally measured  
 909 distance between retina and cornea with eye diameter. **B-C,E-F** Data from individual hawkmoths  
 910 was measured by X-ray microtomography (black dots). The dashed cyan line indicates isometric

911 scaling and the black line represents the allometric scaling relationship.  $R$  is the Pearson correlation  
912 coefficient of the log-transformed data, and  $p$  denotes its statistical significance.

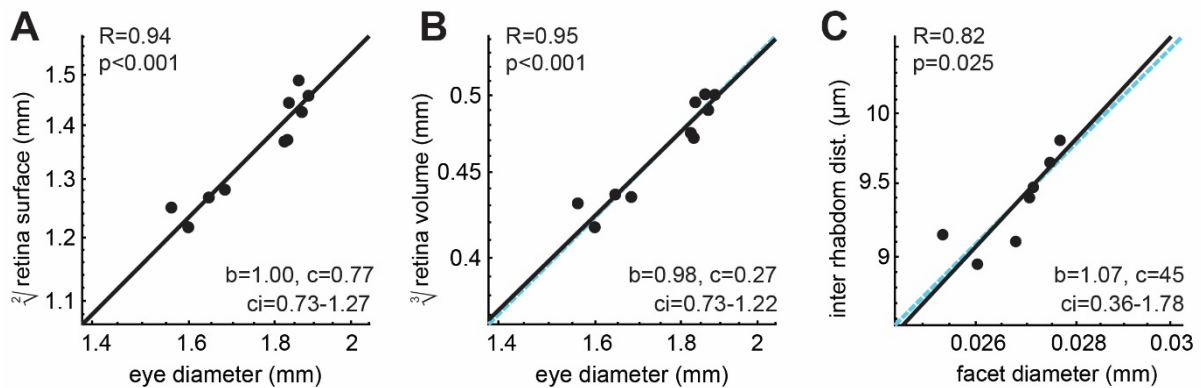

913

914 **Fig. S6 Allometric scaling of the retinal surface, volume and rhabdom distance.**

915 Allometric scaling **A** of the square root of the retinal surface area obtained by 3D reconstructions,  
916 **B** the cube-root of retinal volume with eye size, and **C** and the relationship between of the rhabdom  
917 distance with and facet diameter. **A-C** Data from individual hawkmoths was measured by X-ray  
918 microtomography (black dots). The dashed cyan line indicates isometric scaling and the black line  
919 represents the allometric scaling relationship.  $R$  is the Pearson correlation coefficient of the log-  
920 transformed data, and  $p$  denotes its statistical significance. Given the significant linear correlations  
921 in **B**, the allometric relationship was calculated using reduced major axis regression, with the  
922 exponential scaling exponent  $b$ , the normalization constant  $c$ , and the confidence interval  $ci$  of  $b$ .

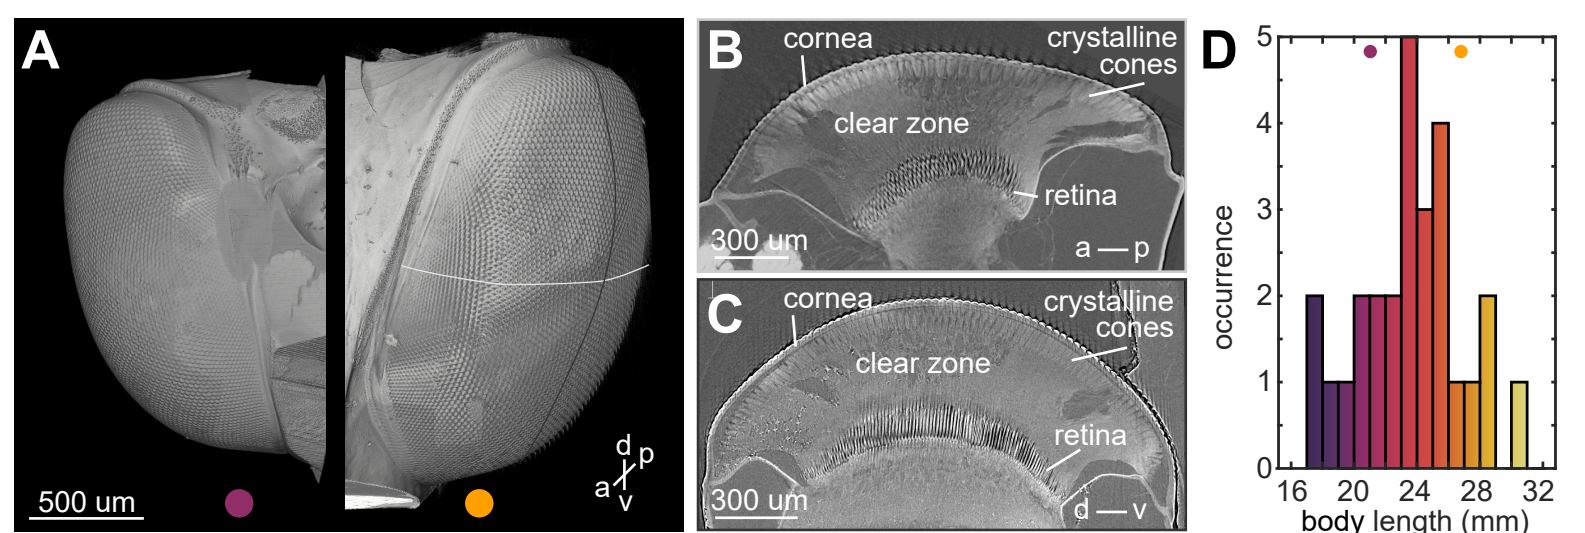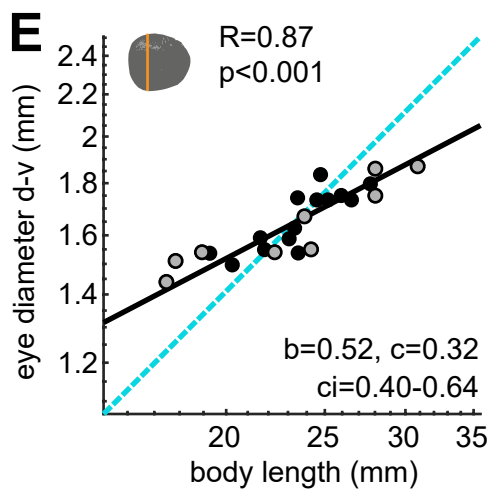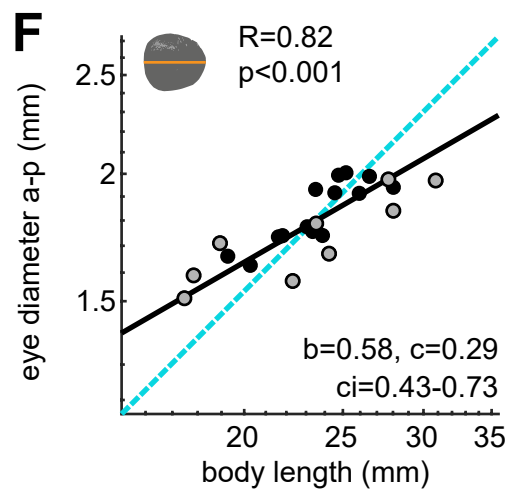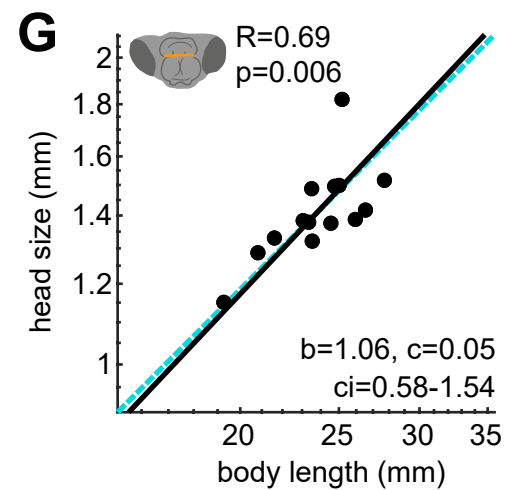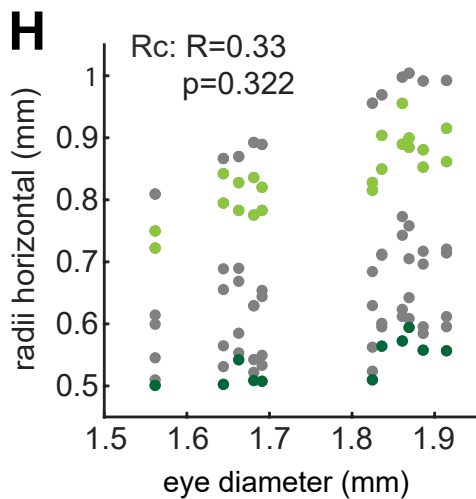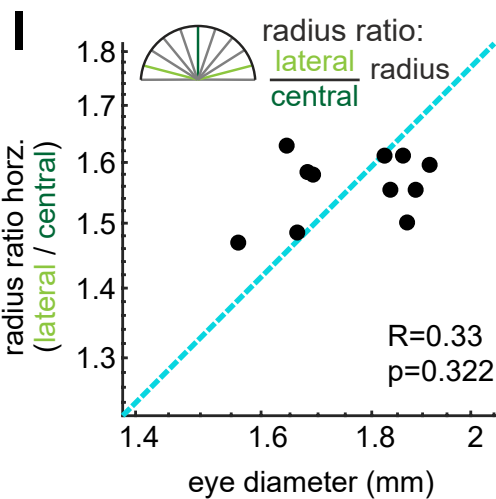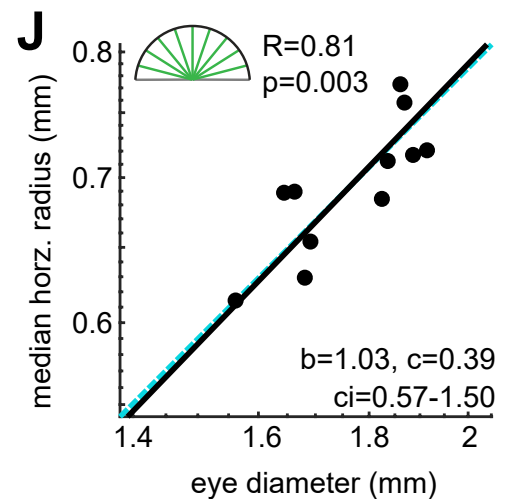

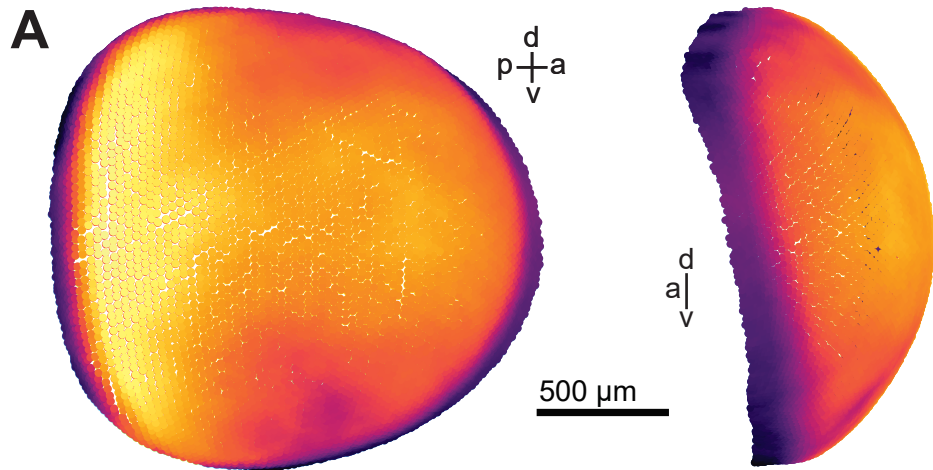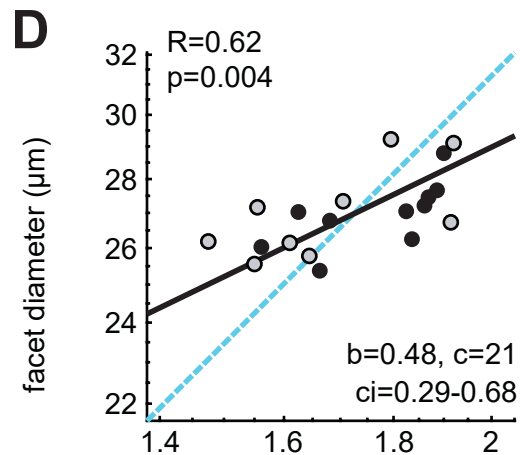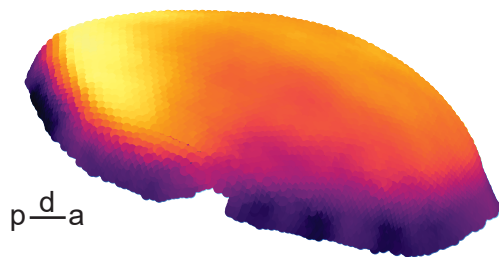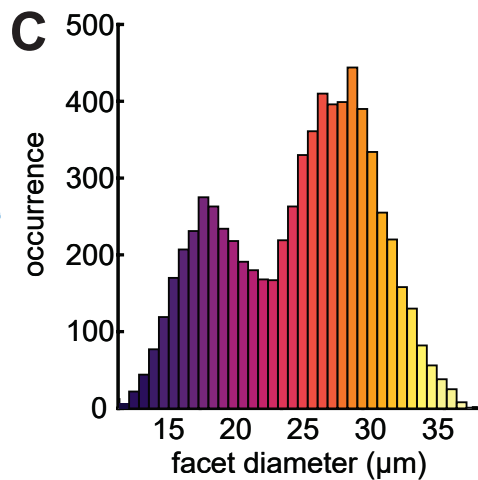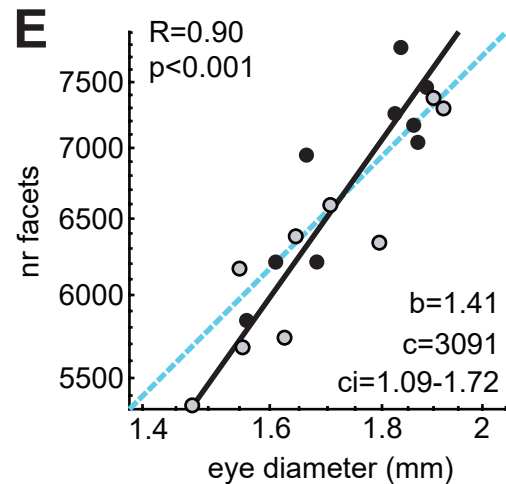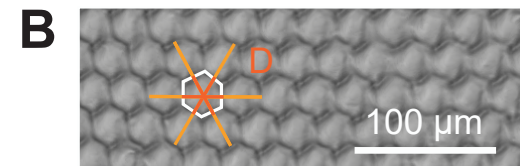

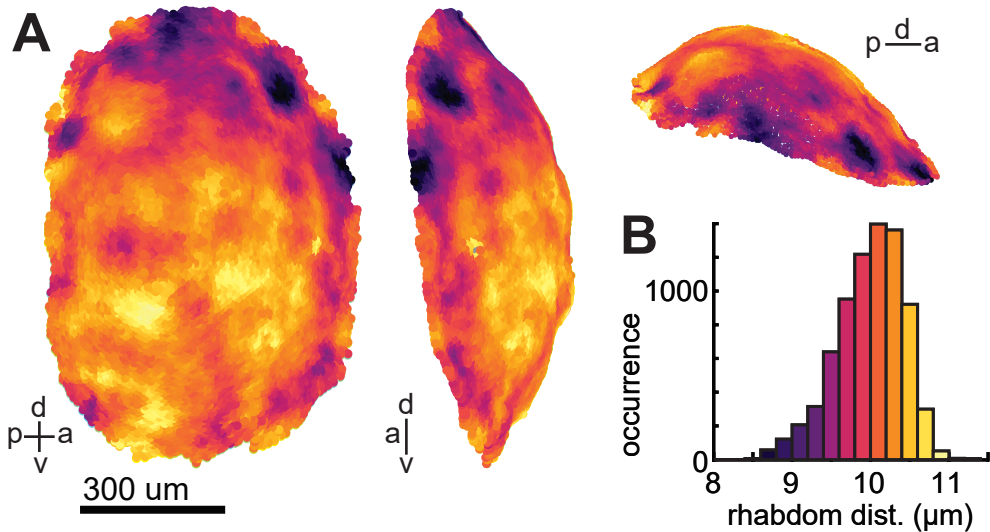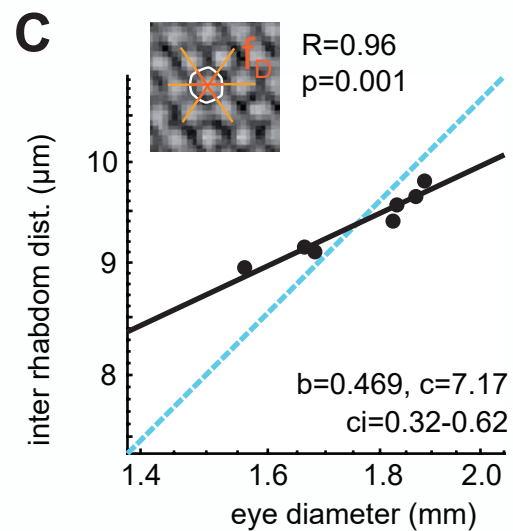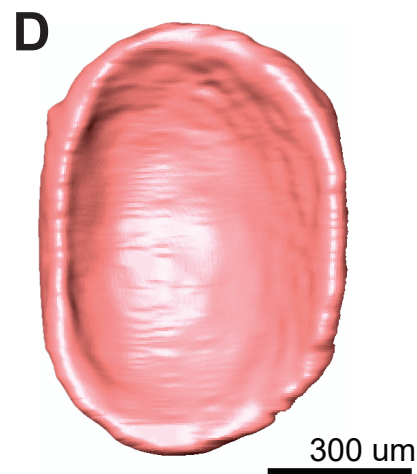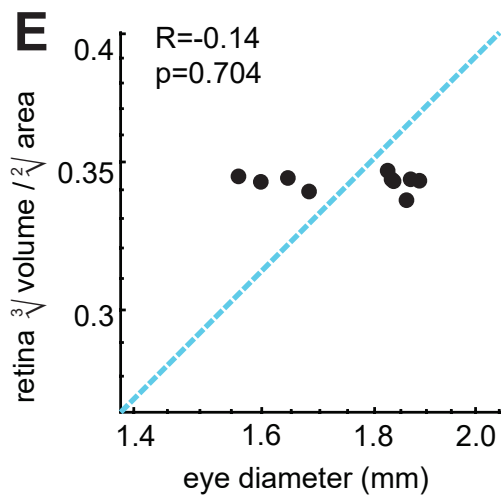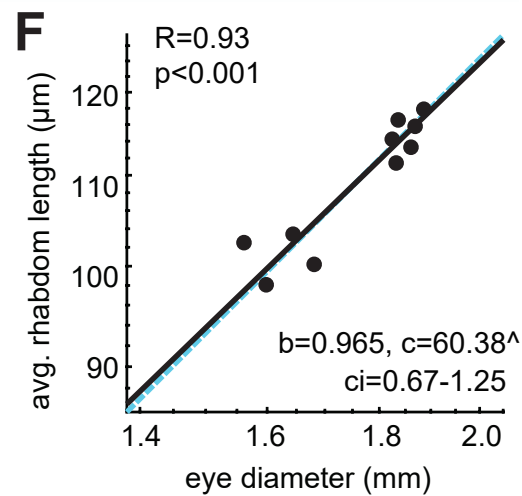

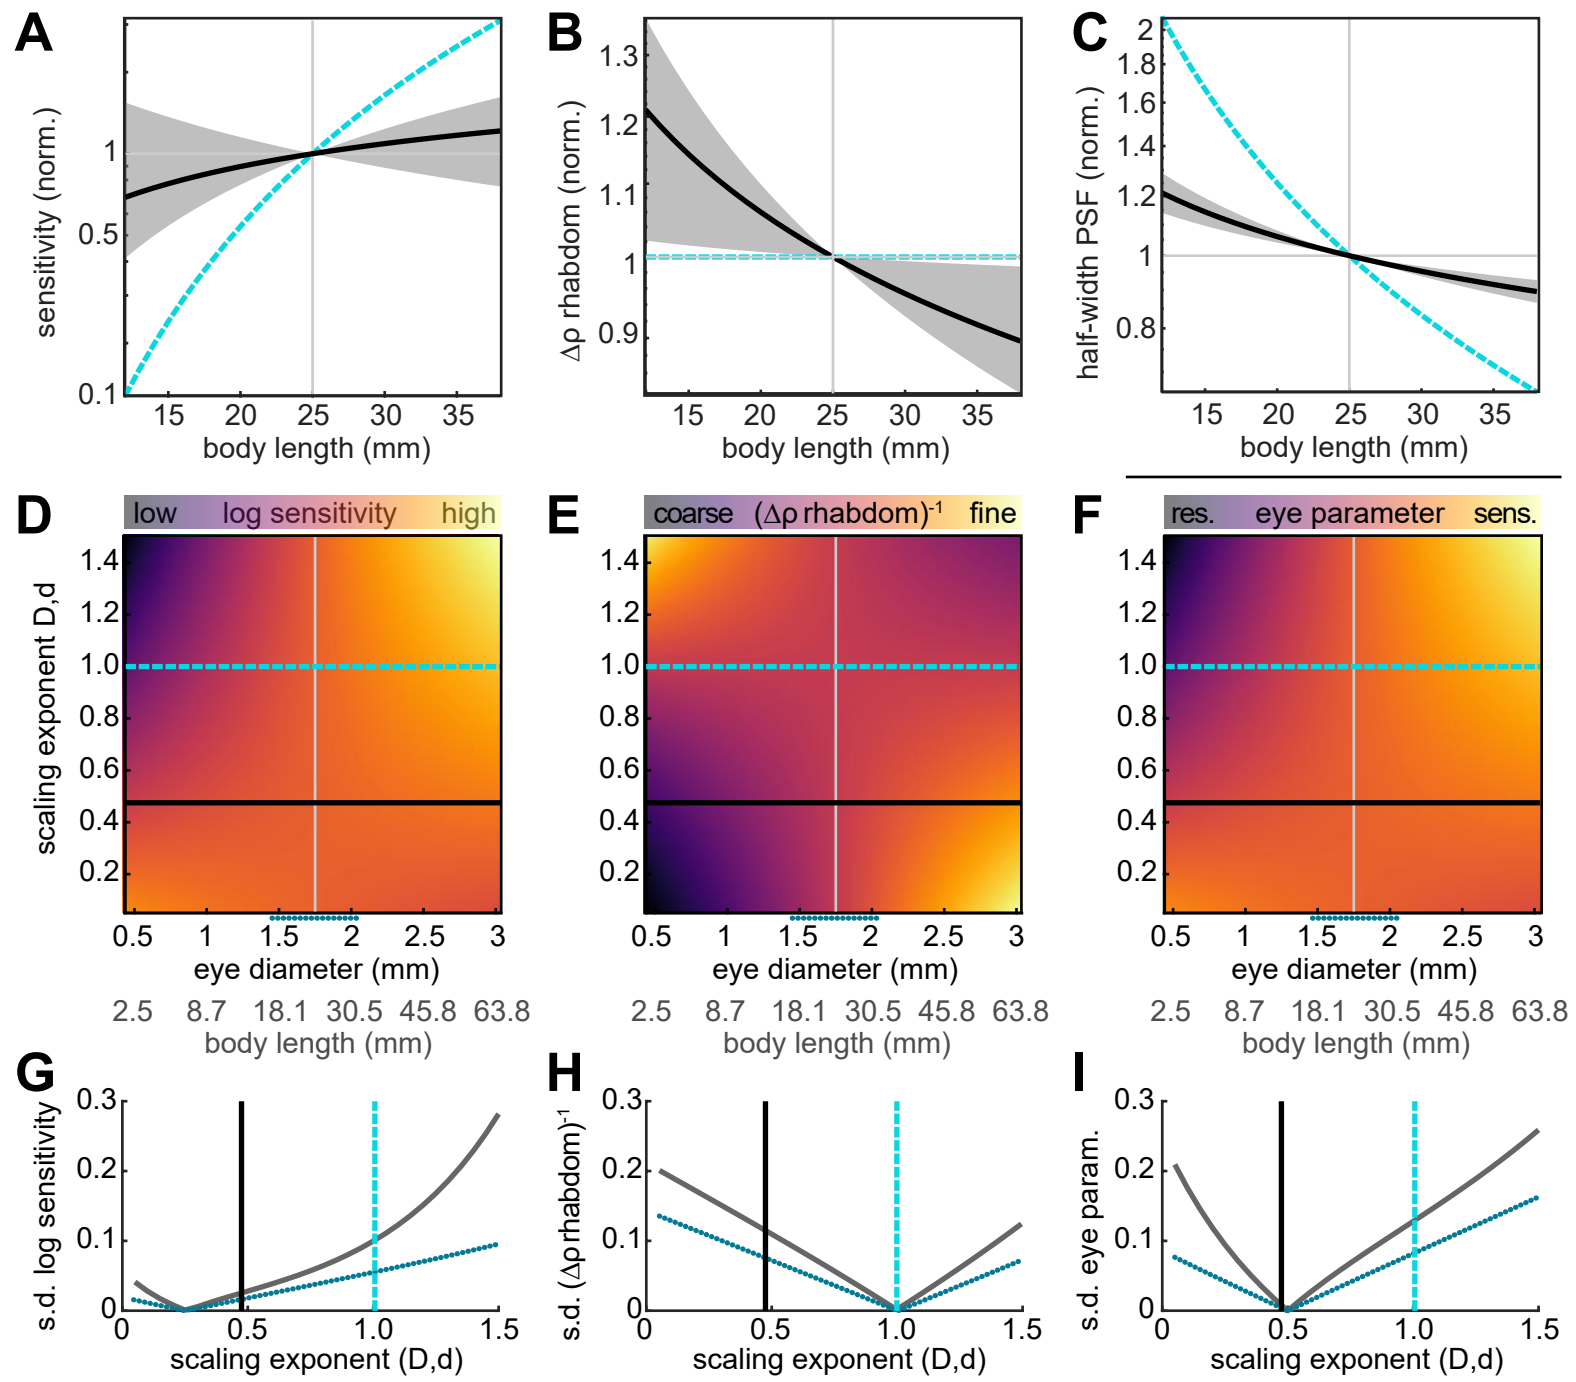

Source: https://www.biorxiv.org/content/10.1101/2022.02.08.479593v1.full.pdf
